# Supplementary material for: Xanthanoltrimer A–C: three xanthanolide sesquiterpene trimers from the fruits of Xanthium italicum Moretti isolated by HPLC-MS-SPE-NMR
Source: Royal Society of Chemistry journal article supplement (doi:10.1039/d0qo01541e), 2021-01-01
Supplement: d0qo01541e1.pdf [file d0qo01541e1.pdf]

**Xanthanoltrimer A-C: Three Xanthanolide Sesquiterpene  
Trimers from the Fruits of *Xanthium italicum* Moretti by  
HPLC-MS-SPE-NMR**

Jiang Fu, Ya-Nan Wang, Shuang-Gang Ma, Li Li, Xiao-Jing Wang, Yong Li, Yun-Bao Liu, Jing Qu\*, and Shi-Shan Yu\*

State Key Laboratory of Bioactive Substance and Function of Natural Medicines, Institute of Materia Medica, Chinese Academy of Medical Sciences and Peking Union Medical College, Beijing 100050, China.

**Supporting Information**

\*To whom correspondence should be addressed. E-mail: yushishan@imm.ac.cn. Tel: +86-10-63165324. Fax: +86-10-63017757.

## List of Contents

### 1. Supporting figures

Figure S1. Experimental ECD spectra of **2** and **1** -----P4

Figure S2. Selected NOESY correlations of compound **3** -----P4

### 2. Spectral information of Xanthanoltrimer A (**1**)

Figure S4. IR spectrum of Xanthanoltrimer A (**1**) -----P5

Figure S5. (+)-HRESIMS data of Xanthanoltrimer A (**1**) -----P5

Figure S6. <sup>1</sup>H NMR spectrum of Xanthanoltrimer A (**1**) in CD<sub>3</sub>OD -----P6

Figure S7. <sup>13</sup>C NMR spectrum of Xanthanoltrimer A (**1**) in CD<sub>3</sub>OD -----P6

Figure S8. DEPT spectrum of Xanthanoltrimer A (**1**) in CD<sub>3</sub>OD -----P7

Figure S9. <sup>1</sup>H-<sup>1</sup>H COSY spectrum of Xanthanoltrimer A (**1**) in CD<sub>3</sub>OD -----P7

Figure S10. HSQC spectrum of Xanthanoltrimer A (**1**) in CD<sub>3</sub>OD -----P8

Figure S11. HMBC spectrum of Xanthanoltrimer A (**1**) in CD<sub>3</sub>OD -----P8

Figure S12. NOE spectrum of Xanthanoltrimer A (**1**) in CD<sub>3</sub>OD -----P9

Figure S13. NOE spectrum of Xanthanoltrimer A (**1**) in CD<sub>3</sub>OD -----P9

Figure S14. NOE spectrum of Xanthanoltrimer A (**1**) in CD<sub>3</sub>OD -----P10

Figure S15. NOE spectrum of Xanthanoltrimer A (**1**) in CD<sub>3</sub>OD -----P10

Figure S16. NOE spectrum of Xanthanoltrimer A (**1**) in CD<sub>3</sub>OD -----P11

Figure S17. NOESY spectrum of Xanthanoltrimer A (**1**) in CD<sub>3</sub>OD -----P11

Figure S18. Experimental UV spectrum of Xanthanoltrimer A (**1**) in MeOH -----P12

### 3. Spectral information of Xanthanoltrimer B (**2**)

Figure S19. IR spectrum of Xanthanoltrimer B (**2**) -----P12

Figure S20. (+)-HRESIMS data of Xanthanoltrimer B (**2**) -----P13

Figure S21. <sup>1</sup>H NMR spectrum of Xanthanoltrimer B (**2**) in CD<sub>3</sub>OD -----P13

Figure S22. <sup>13</sup>C NMR spectrum of Xanthanoltrimer B (**2**) in CD<sub>3</sub>OD -----P14

Figure S23. DEPT spectrum of Xanthanoltrimer B (**2**) in CD<sub>3</sub>OD -----P14

Figure S24. <sup>1</sup>H-<sup>1</sup>H COSY spectrum of Xanthanoltrimer B (**2**) in CD<sub>3</sub>OD -----P15

Figure S25. HSQC spectrum of Xanthanoltrimer B (**2**) in CD<sub>3</sub>OD -----P15

Figure S26. HMBC spectrum of Xanthanoltrimer B (**2**) in CD<sub>3</sub>OD -----P16

Figure S27. NOE spectrum of Xanthanoltrimer B (**2**) in CD<sub>3</sub>OD -----P16

Figure S28. NOE spectrum of Xanthanoltrimer B (**2**) in CD<sub>3</sub>OD -----P17

Figure S29. NOE spectrum of Xanthanoltrimer B (**2**) in CD<sub>3</sub>OD -----P17

Figure S30. NOE spectrum of Xanthanoltrimer B (**2**) in CD<sub>3</sub>OD -----P18

Figure S31. NOESY spectrum of Xanthanoltrimer B (**2**) in CD<sub>3</sub>OD -----P18

|                                                                                                                               |     |
|-------------------------------------------------------------------------------------------------------------------------------|-----|
| <b>Figure S32.</b> Experimental UV spectrum of Xanthanoltrimer B ( <b>2</b> ) in MeOH -----                                   | P19 |
| <b>4. Spectral information of Xanthanoltrimer C (3)</b>                                                                       |     |
| <b>Figure S33.</b> IR spectrum of Xanthanoltrimer C ( <b>3</b> ) -----                                                        | P19 |
| <b>Figure S34.</b> (+)-HRESIMS data of Xanthanoltrimer C ( <b>3</b> ) -----                                                   | P20 |
| <b>Figure S35.</b> <sup>1</sup> H NMR spectrum of Xanthanoltrimer C ( <b>3</b> ) in CD <sub>3</sub> OD -----                  | P20 |
| <b>Figure S36.</b> <sup>13</sup> C NMR spectrum of Xanthanoltrimer C ( <b>3</b> ) in CD <sub>3</sub> OD -----                 | P21 |
| <b>Figure S37.</b> DEPT spectrum of Xanthanoltrimer C ( <b>3</b> ) in CD <sub>3</sub> OD -----                                | P21 |
| <b>Figure S38.</b> <sup>1</sup> H- <sup>1</sup> H COSY spectrum of Xanthanoltrimer C ( <b>3</b> ) in CD <sub>3</sub> OD ----- | P22 |
| <b>Figure S39.</b> HSQC spectrum of Xanthanoltrimer C ( <b>3</b> ) in CD <sub>3</sub> OD -----                                | P22 |
| <b>Figure S40.</b> HMBC spectrum of Xanthanoltrimer C ( <b>3</b> ) in CD <sub>3</sub> OD -----                                | P23 |
| <b>Figure S41.</b> NOE spectrum of Xanthanoltrimer C ( <b>3</b> ) in CD <sub>3</sub> OD -----                                 | P23 |
| <b>Figure S42.</b> NOE spectrum of Xanthanoltrimer C ( <b>3</b> ) in CD <sub>3</sub> OD -----                                 | P24 |
| <b>Figure S43.</b> NOE spectrum of Xanthanoltrimer C ( <b>3</b> ) in CD <sub>3</sub> OD -----                                 | P24 |
| <b>Figure S44.</b> NOE spectrum of Xanthanoltrimer C ( <b>3</b> ) in CD <sub>3</sub> OD -----                                 | P25 |
| <b>Figure S45.</b> NOE spectrum of Xanthanoltrimer C ( <b>3</b> ) in CD <sub>3</sub> OD -----                                 | P25 |
| <b>Figure S46.</b> NOESY spectrum of Xanthanoltrimer C ( <b>3</b> ) in CD <sub>3</sub> OD -----                               | P26 |
| <b>Figure S47.</b> Experimental UV spectrum of Xanthanoltrimer C ( <b>3</b> ) in MeOH -----                                   | P26 |
| <b>5. NMR chemical shifts calculation of Xanthanoltrimer A (1)</b> -----                                                      |     |
| <b>6. NMR chemical shifts calculation of Xanthanoltrimer C (3)</b> -----                                                      |     |
|                                                                                                                               | P33 |

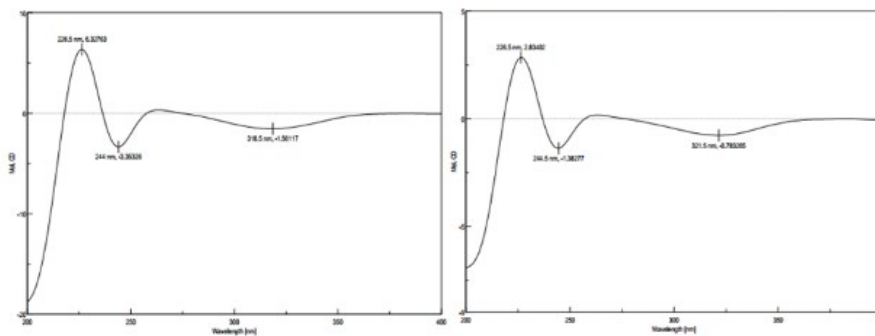

**Figure S1.** Experimental ECD spectra of Xanthanoltrimer B (**2**) and Xanthanoltrimer A (**1**)

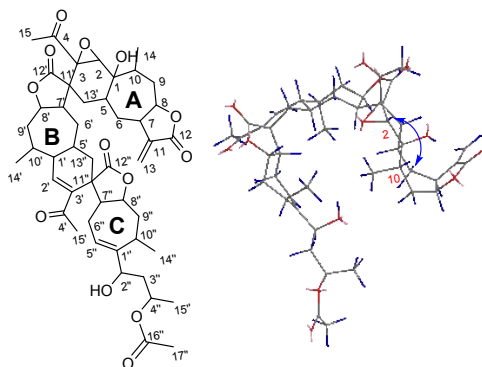

**Figure S2.** Selected NOESY correlations of compound Xanthanoltrimer C (**3**)

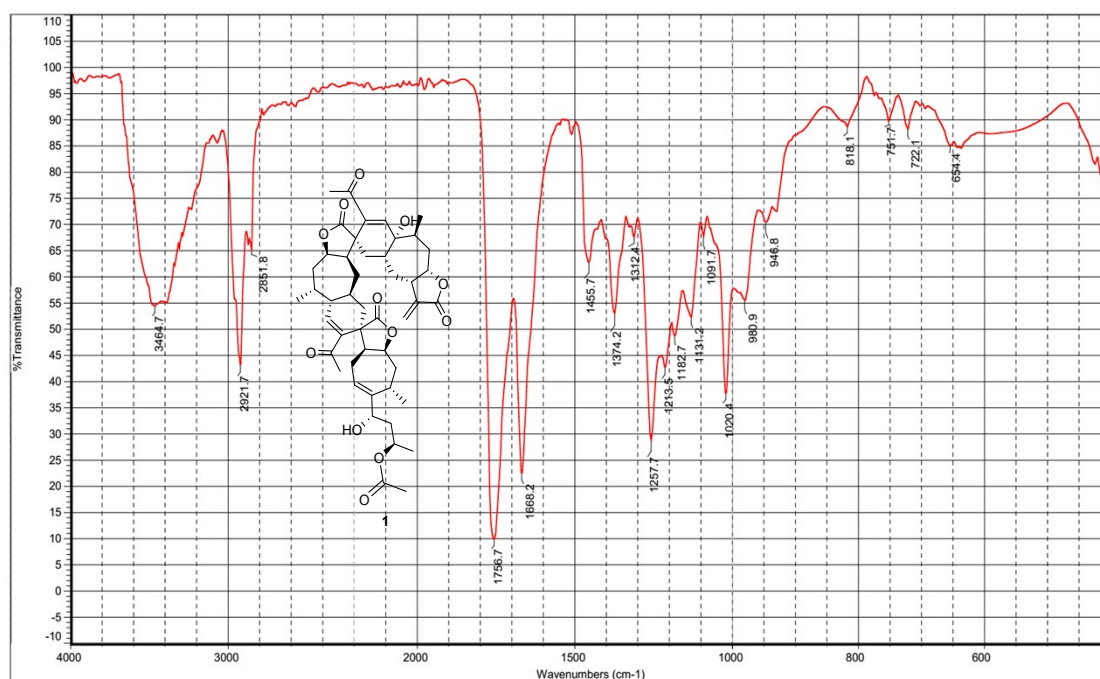

Figure S4. IR spectrum of Xanthanoltrimer A (1)

MS Formula Results: + Scan (7.640 min) Sub (2017112401.d)

| m/z     | Ion                 | Formula        | Abundance |
|---------|---------------------|----------------|-----------|
| 839.397 | (M+Na) <sup>+</sup> | C47 H60 Na O12 | 567225.2  |

  

| Best | Formula (M)       | Ion Formula          | Score | Cross Sco | Mass     | Calc Mass | Calc m/z | Diff (ppm) | Abs Diff (ppm) | Mass Match | Abund Match | Spacing Match | DIBE |
|------|-------------------|----------------------|-------|-----------|----------|-----------|----------|------------|----------------|------------|-------------|---------------|------|
| ✓    | C47 H60 O12       | C47 H60 Na O12       | 99.89 |           | 816.4078 | 816.4085  | 839.3977 | 0.83       | 0.83           | 99.98      | 99.69       | 99.95         | 18   |
|      | C48 H56 N4 O8     | C48 H56 N4 Na O8     | 99.67 |           | 816.4078 | 816.4098  | 839.399  | 2.45       | 2.45           | 99.79      | 99.23       | 99.96         | 23   |
|      | C42 H60 N2 O14    | C42 H60 N2 Na O14    | 99.54 |           | 816.4078 | 816.4045  | 839.3937 | -4.11      | 4.11           | 99.42      | 99.39       | 99.97         | 14   |
|      | C51 H60 O7 S      | C51 H60 Na O7 S      | 99.34 |           | 816.4078 | 816.406   | 839.3952 | -2.25      | 2.25           | 99.83      | 97.98       | 99.99         | 22   |
|      | C39 H64 N2 O14 S  | C39 H64 N2 Na O14 S  | 99.29 |           | 816.4078 | 816.4078  | 839.397  | 0          | 0              | 100        | 97.55       | 99.96         | 9    |
|      | C52 H56 N4 O3 S   | C52 H56 N4 Na O3 S   | 99.25 |           | 816.4078 | 816.4073  | 839.3965 | -0.63      | 0.63           | 99.99      | 97.4        | 99.99         | 27   |
|      | C44 H64 O12 S     | C44 H64 Na O12 S     | 99.23 |           | 816.4078 | 816.4118  | 839.4011 | 4.94       | 4.94           | 99.16      | 98.71       | 99.98         | 13   |
|      | C45 H60 N4 O8 S   | C45 H60 N4 Na O8 S   | 99.03 |           | 816.4078 | 816.4132  | 839.4024 | 6.56       | 6.56           | 98.53      | 99.09       | 99.98         | 18   |
|      | C46 H60 N2 O9 S   | C46 H60 N2 Na O9 S   | 98.85 |           | 816.4078 | 816.402   | 839.3912 | -7.19      | 7.19           | 98.23      | 98.93       | 99.98         | 18   |
|      | C54 H56 O7        | C54 H56 Na O7        | 98.65 |           | 816.4078 | 816.4026  | 839.3918 | -6.36      | 6.36           | 98.62      | 97.63       | 99.94         | 27   |
|      | C35 H64 N2 O19    | C35 H64 N2 Na O19    | 98.6  |           | 816.4078 | 816.4103  | 839.3995 | 3.09       | 3.09           | 99.67      | 95.67       | 99.98         | 5    |
|      | C55 H52 N4 O3     | C55 H52 N4 Na O3     | 98.58 |           | 816.4078 | 816.4039  | 839.3932 | -4.75      | 4.75           | 99.23      | 96.37       | 99.95         | 32   |
|      | C40 H64 O17       | C40 H64 Na O17       | 98.52 |           | 816.4078 | 816.4144  | 839.4036 | 8.03       | 8.03           | 97.8       | 98.51       | 99.97         | 9    |
|      | C48 H64 O7 S2     | C48 H64 N2 O7 S2     | 98.48 |           | 816.4078 | 816.4093  | 839.3986 | 1.86       | 1.86           | 99.88      | 94.96       | 99.9          | 17   |
|      | C53 H56 N2 O6     | C53 H56 N2 Na O6     | 98.46 |           | 816.4078 | 816.4138  | 839.4031 | 7.39       | 7.39           | 98.14      | 97.75       | 99.95         | 27   |
|      | C43 H64 N2 O9 S2  | C43 H64 N2 Na O9 S2  | 98.41 |           | 816.4078 | 816.4053  | 839.3945 | -3.08      | 3.08           | 99.67      | 95.11       | 99.86         | 13   |
|      | C49 H60 N4 O3 S2  | C49 H60 N4 Na O3 S2  | 98.38 |           | 816.4078 | 816.4107  | 839.3999 | 3.48       | 3.48           | 99.58      | 95.1        | 99.9          | 22   |
|      | C57 H56 N2 O1 S   | C57 H56 N2 Na O1 S   | 98.3  |           | 816.4078 | 816.4113  | 839.4006 | 4.31       | 4.31           | 99.36      | 95.1        | 100           | 31   |
|      | C41 H60 N4 O13    | C41 H60 N4 Na O13    | 98.28 |           | 816.4078 | 816.4157  | 839.4049 | 9.64       | 9.64           | 96.85      | 99.26       | 99.97         | 14   |
|      | C60 H52 N2 O      | C60 H52 N2 Na O      | 98.19 |           | 816.4078 | 816.408   | 839.3972 | 0.19       | 0.19           | 100        | 93.71       | 99.94         | 36   |
|      | C34 H64 N4 O16 S  | C34 H64 N4 Na O16 S  | 98.06 |           | 816.4078 | 816.4038  | 839.393  | -4.95      | 4.95           | 99.16      | 94.68       | 99.93         | 5    |
|      | C37 H60 N4 O16    | C37 H60 N4 Na O16    | 97.99 |           | 816.4078 | 816.4004  | 839.3897 | -9.05      | 9.05           | 97.21      | 97.63       | 99.98         | 10   |
|      | C49 H56 N2 O9     | C49 H56 N2 Na O9     | 97.71 |           | 816.4078 | 816.3986  | 839.3878 | -11.3      | 11.3           | 95.69      | 99.19       | 99.96         | 23   |
|      | C55 H60 O2 S2     | C55 H60 Na O2 S2     | 97.52 |           | 816.4078 | 816.4035  | 839.3927 | -5.33      | 5.33           | 99.03      | 93          | 99.95         | 26   |
|      | C36 H68 N2 O14 S2 | C36 H68 N2 Na O14 S2 | 97.38 |           | 816.4078 | 816.4112  | 839.4004 | 4.11       | 4.11           | 99.42      | 91.99       | 99.79         | 4    |
|      | C50 H60 N2 O6 S   | C50 H60 N2 Na O6 S   | 97.37 |           | 816.4078 | 816.4172  | 839.4064 | 11.5       | 11.5           | 95.54      | 98.22       | 99.99         | 22   |
|      | C30 H64 N4 O21    | C30 H64 N4 Na O21    | 97.27 |           | 816.4078 | 816.4063  | 839.3955 | -1.86      | 1.86           | 99.88      | 90.66       | 99.99         | 1    |
|      | C41 H60 N4 O11 S  | C41 H60 N4 Na O11 S  | 97.25 |           | 816.4078 | 816.3979  | 839.3872 | -12.14     | 12.14          | 95.05      | 98.66       | 99.96         | 14   |
|      | C38 H64 N4 O11 S2 | C38 H64 N4 Na O11 S2 | 97.17 |           | 816.4078 | 816.4013  | 839.3905 | -8.03      | 8.03           | 97.8       | 93.92       | 99.8          | 9    |
|      | C58 H56 O2 S      | C58 H56 Na O2 S      | 97.07 |           | 816.4078 | 816.4001  | 839.3893 | -9.44      | 9.44           | 96.97      | 94.79       | 100           | 31   |
|      | C33 H68 O20 S     | C33 H68 Na O20 S     | 97    |           | 816.4078 | 816.4025  | 839.3917 | -6.55      | 6.55           | 98.53      | 92.01       | 99.93         | 0    |
|      | C36 H64 O20       | C36 H64 Na O20       | 96.99 |           | 816.4078 | 816.3991  | 839.3883 | -10.66     | 10.66          | 96.16      | 95.88       | 99.97         | 5    |
|      | C41 H68 O12 S2    | C41 H68 Na O12 S2    | 96.96 |           | 816.4078 | 816.4152  | 839.4044 | 9.06       | 9.06           | 97.21      | 94.12       | 99.85         | 8    |
|      | C54 H60 N2 O S2   | C54 H60 N2 Na O S2   | 96.95 |           | 816.4078 | 816.4147  | 839.4039 | 8.42       | 8.42           | 97.58      | 93.41       | 99.94         | 26   |
|      | C42 H64 N4 O8 S2  | C42 H64 N4 Na O8 S2  | 96.8  |           | 816.4078 | 816.4166  | 839.4058 | 10.67      | 10.67          | 96.15      | 95.35       | 99.84         | 13   |
|      | C32 H68 N2 O19 S  | C32 H68 N2 Na O19 S  | 96.79 |           | 816.4078 | 816.4137  | 839.4029 | 7.19       | 7.19           | 98.23      | 91.78       | 99.92         | 0    |

Figure S5. (+)-HRESIMS data of Xanthanoltrimer A (1)

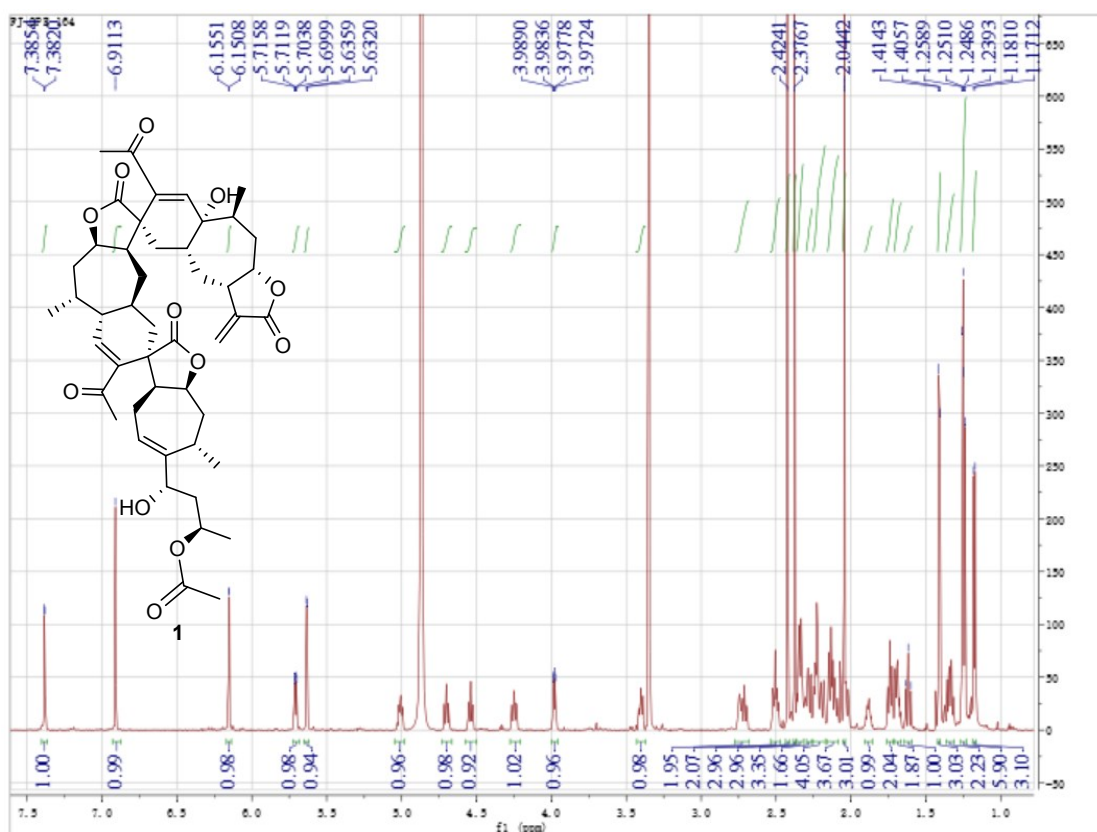

Figure S6. <sup>1</sup>H NMR spectrum of Xanthanoltrimer A (**1**) (800 MHz, in CD<sub>3</sub>OD)

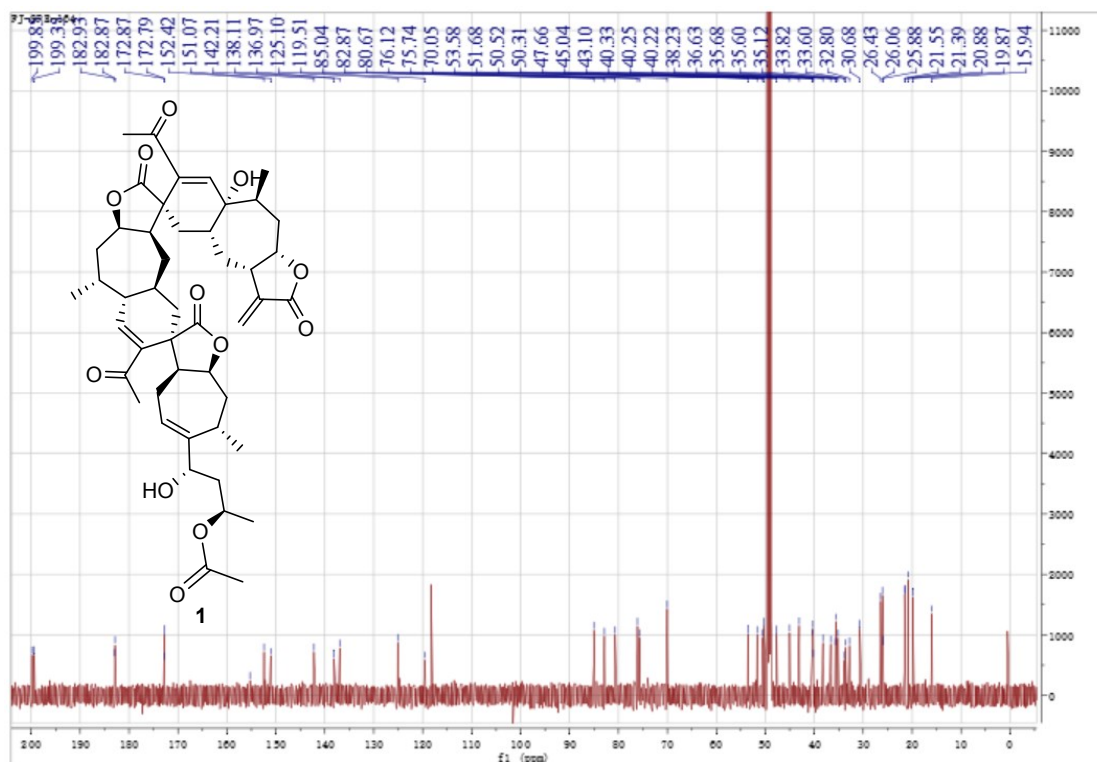

Figure S7. <sup>13</sup>C NMR spectrum of Xanthanoltrimer A (**1**) (200 MHz, in CD<sub>3</sub>OD)

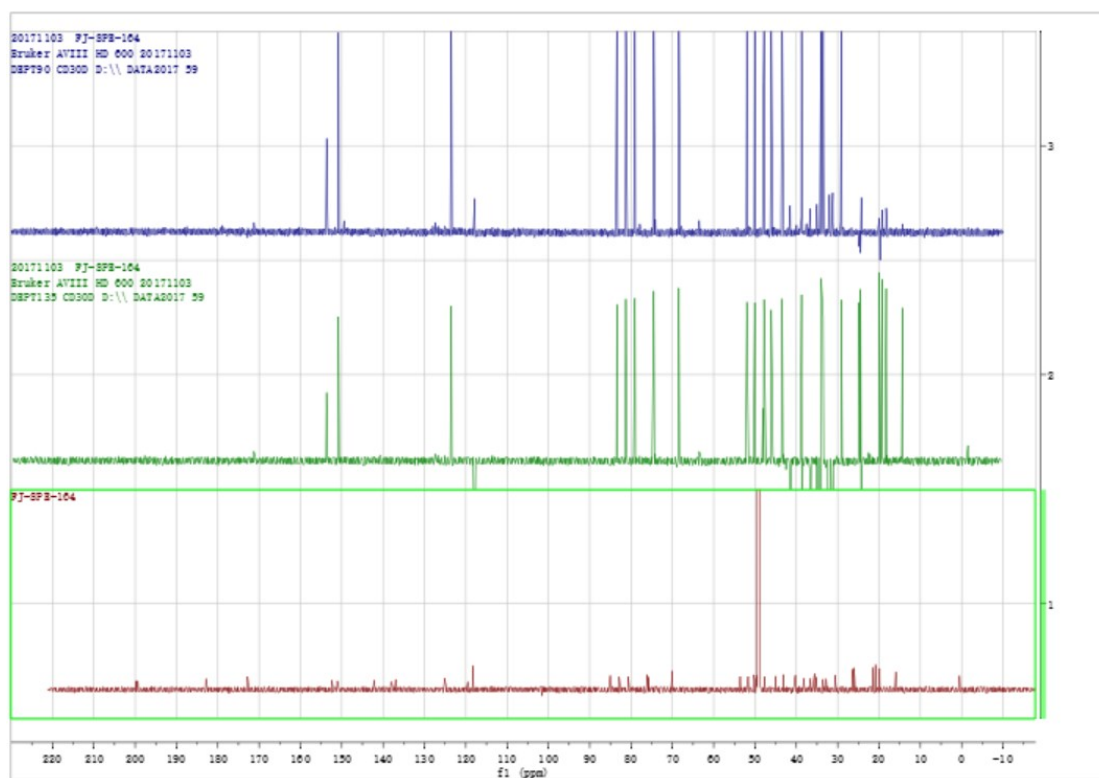

**Figure S8.** DEPT spectrum of Xanthanoltrimer A (**1**) (150 MHz, in CD<sub>3</sub>OD)

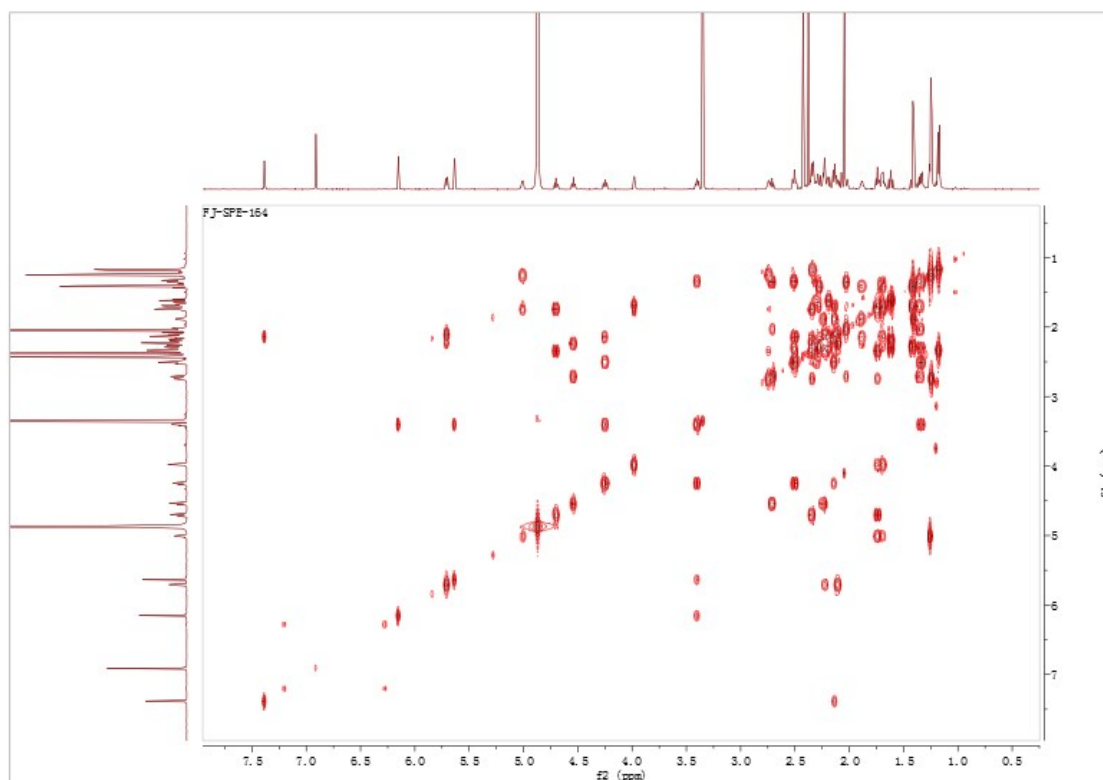

**Figure S9.** <sup>1</sup>H-<sup>1</sup>H COSY spectrum of Xanthanoltrimer A (**1**)

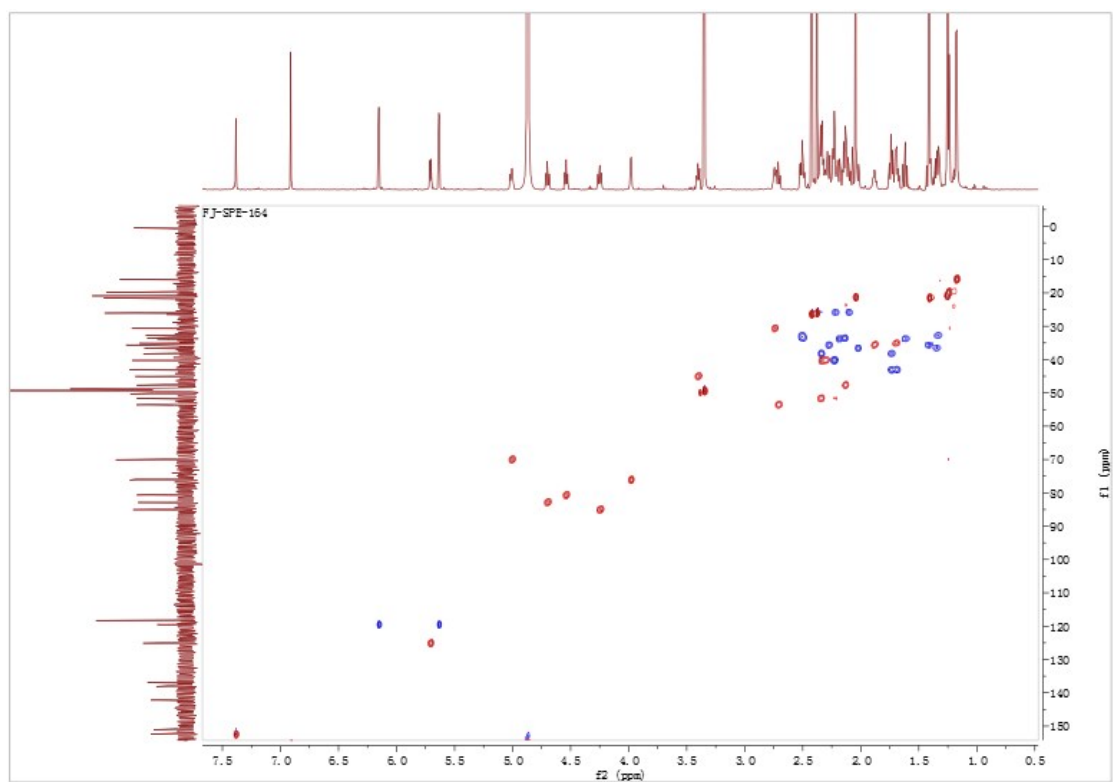

**Figure S10.** HSQC spectrum of Xanthanoltrimer A (1)

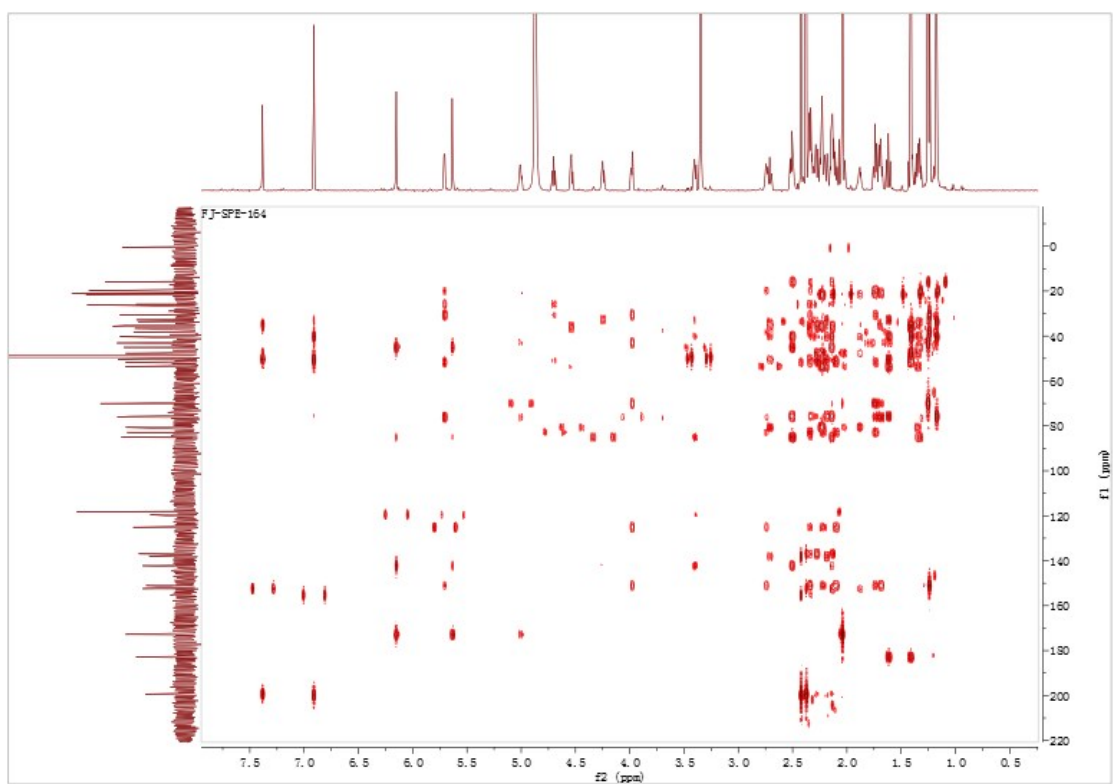

**Figure S11.** HMBC spectrum of Xanthanoltrimer A (1)



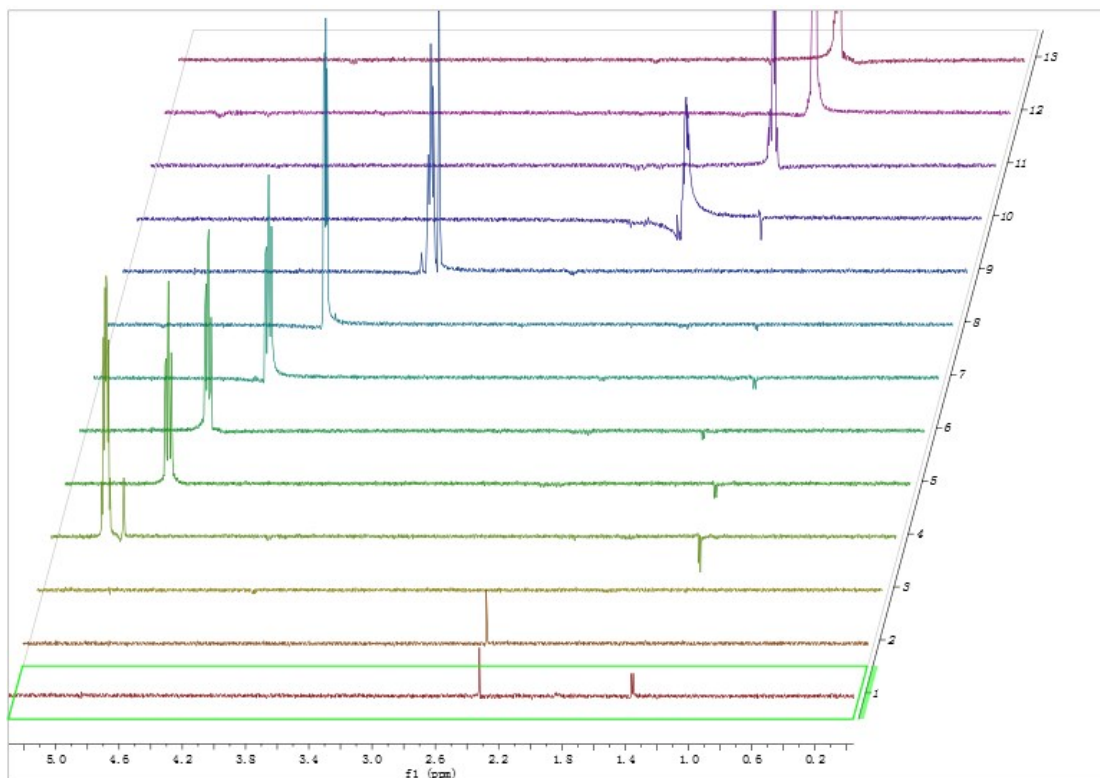

**Figure S12.** NOE spectrum of Xanthanoltrimer A (**1**) (600 MHz, in CD<sub>3</sub>OD)

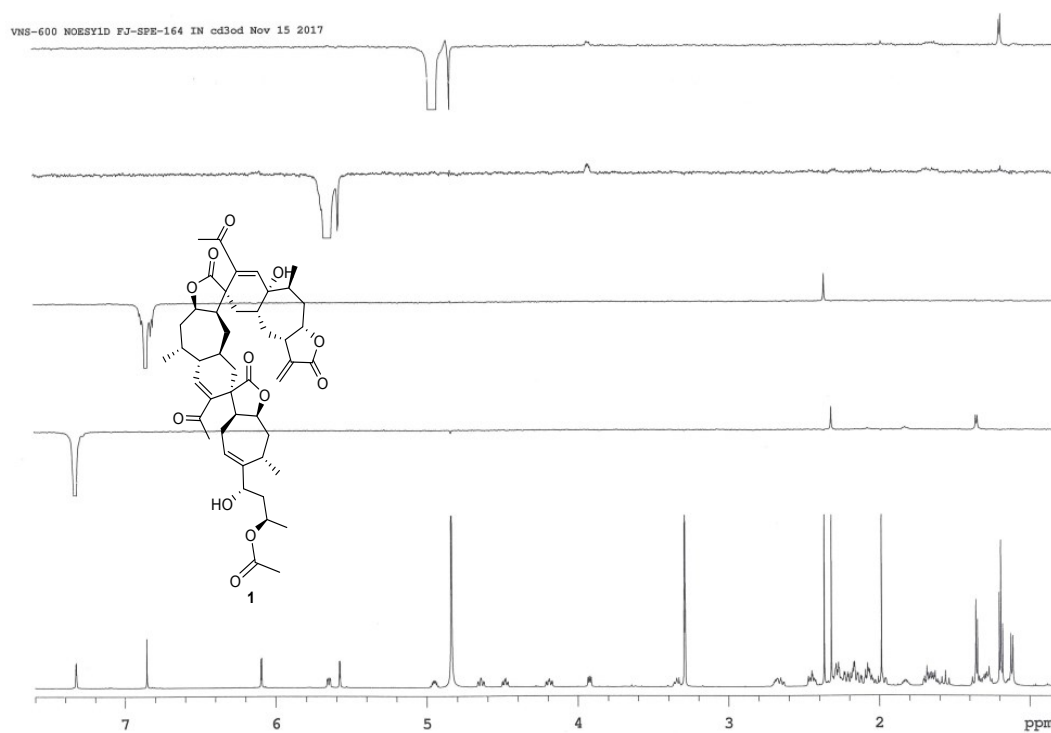

**Figure S13.** NOE spectrum of Xanthanoltrimer A (**1**) (600 MHz, in CD<sub>3</sub>OD)

VNS-600 NOESY1D FJ-SPE-164 IN cd3od Nov 15 2017

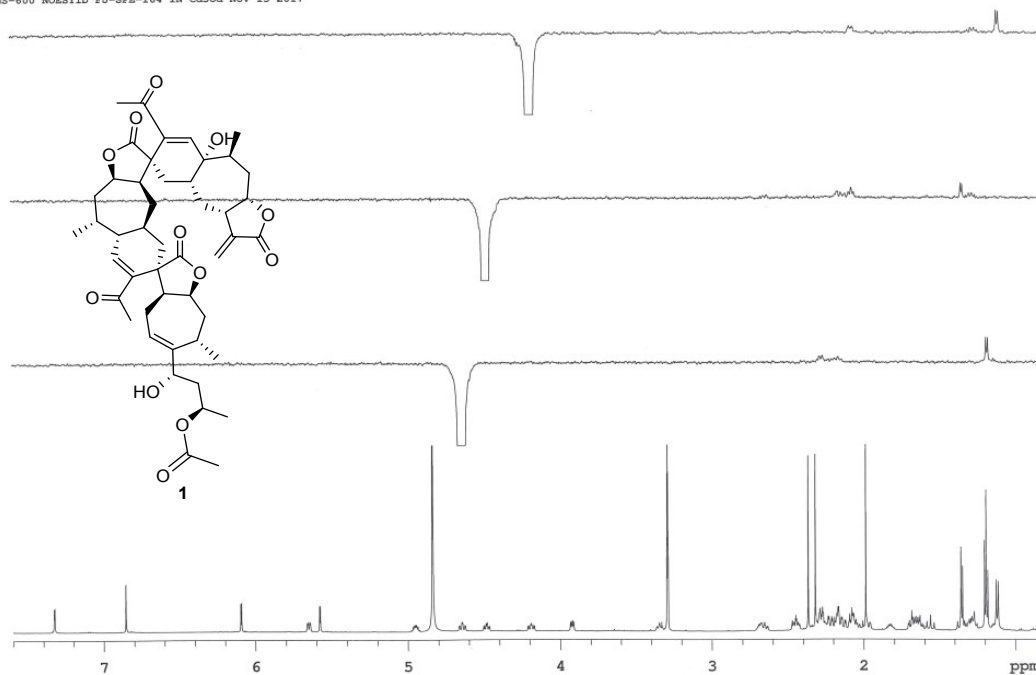

**Figure S14.** NOE spectrum of Xanthanoltrimer A (1) (600 MHz, in CD<sub>3</sub>OD)

VNS-600 NOESY1D FJ-SPE-164 IN cd3od Nov 15 2017

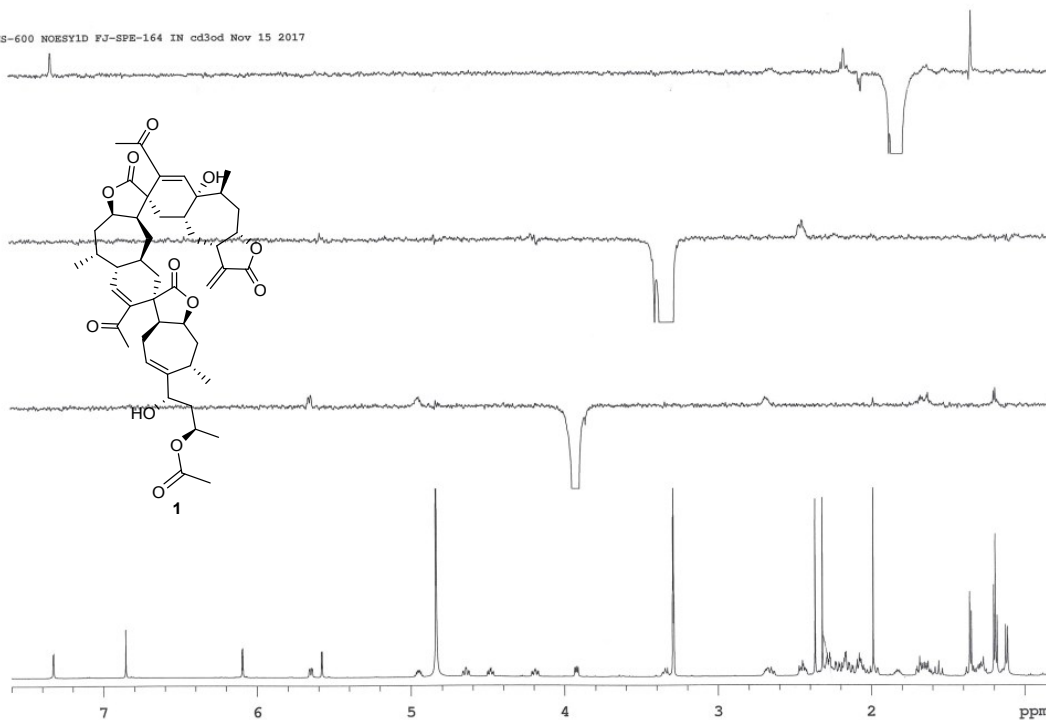

**Figure S15.** NOE spectrum of Xanthanoltrimer A (1) (600 MHz, in CD<sub>3</sub>OD)

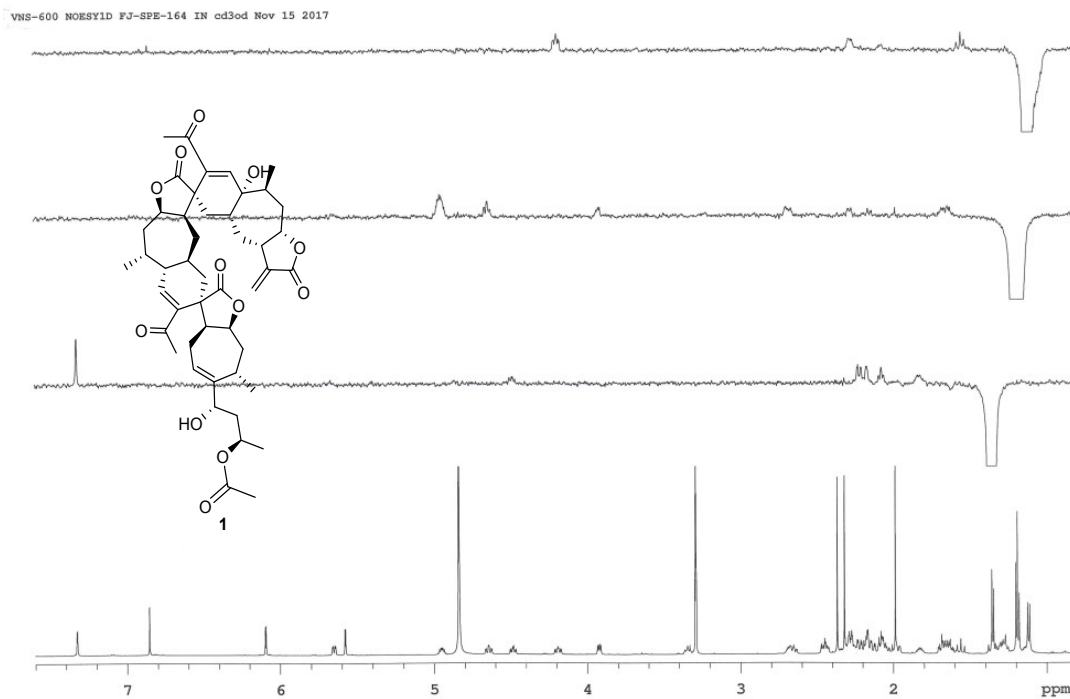

**Figure S16.** NOE spectrum of Xanthanoltrimer A (**1**) (600 MHz, in CD<sub>3</sub>OD)

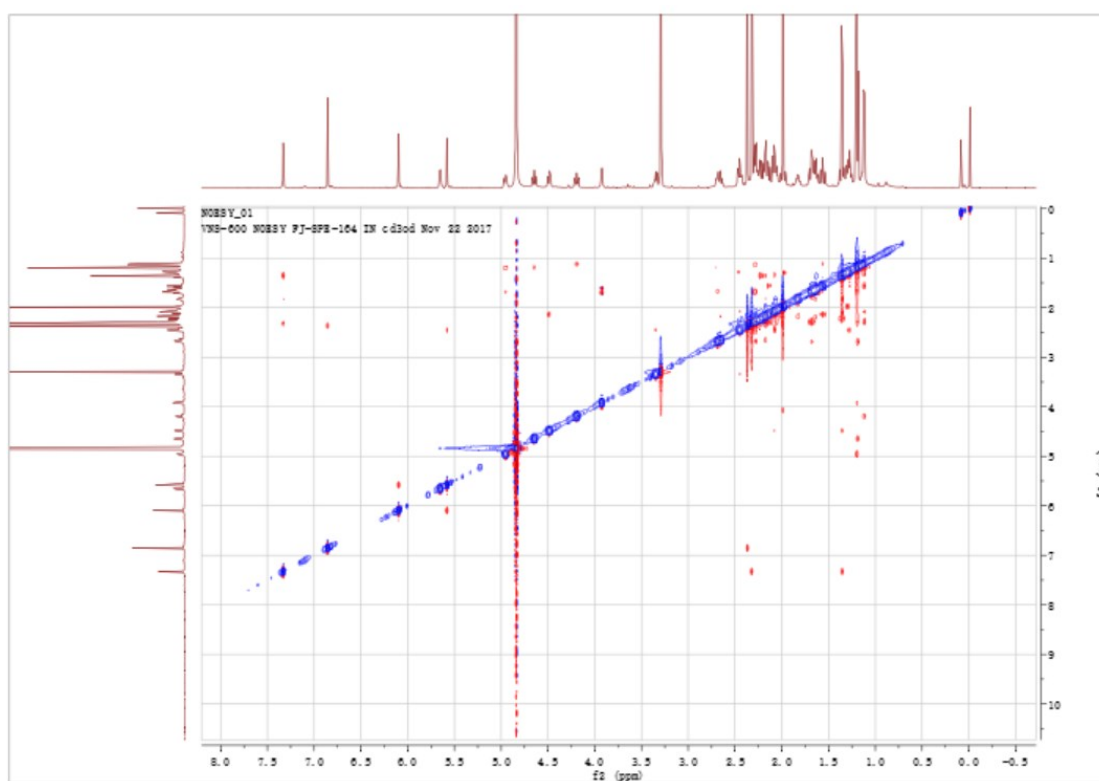

**Figure S17.** NOESY spectrum of Xanthanoltrimer A (**1**) (600 MHz, in CD<sub>3</sub>OD)

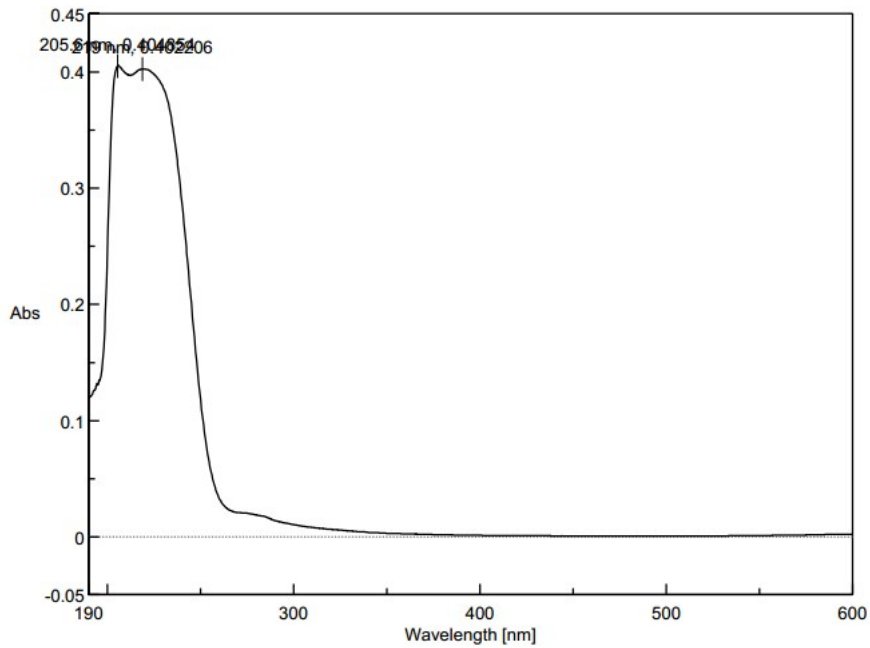

**Figure S18.** Experimental UV spectrum of Xanthanoltrimer A (**1**) in MeOH

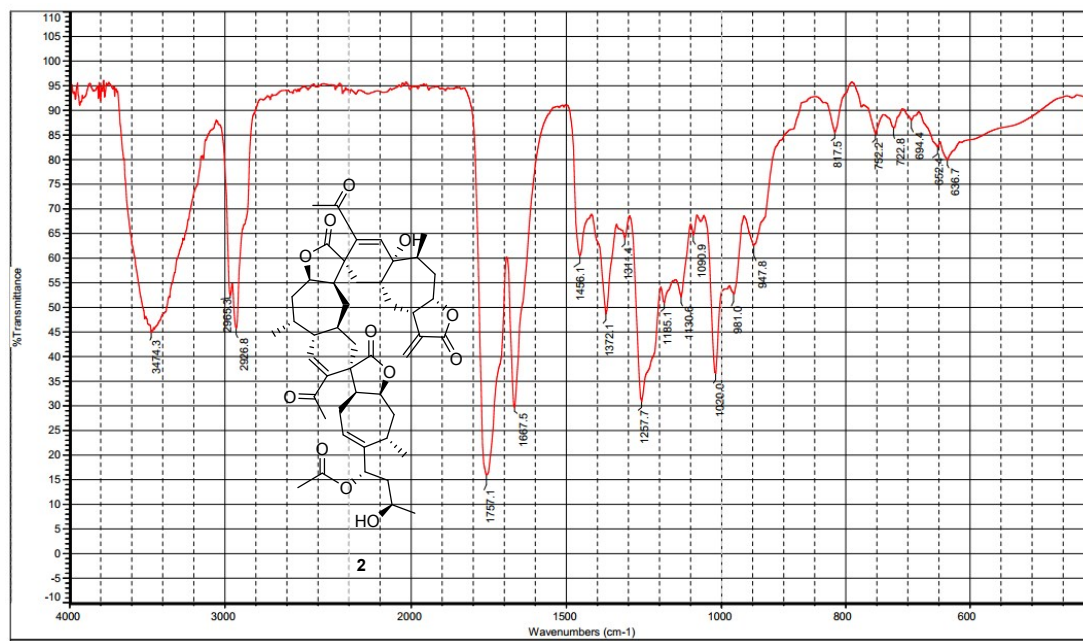

**Figure S19.** IR spectrum of Xanthanoltrimer B (**2**)

MS Formula Results: - Scan (7.551 min) Sub (2017111602.d)

| m/z      | Ion                   | Formula     | Abundance |
|----------|-----------------------|-------------|-----------|
| 861.4036 | (M+COOH) <sup>-</sup> | C48 H61 O14 | 30473.8   |

  

| Best | Formula (M)       | Ion Formula       | Score | Cross Sco | Mass     | Calc Mass | Calc m/z | Diff (ppm) | Abs Diff (ppm) | Mass Match | Abund Match | Spacing Match | DBE |
|------|-------------------|-------------------|-------|-----------|----------|-----------|----------|------------|----------------|------------|-------------|---------------|-----|
| ✓    | C47 H60 O12       | C48 H61 O14       | 99.43 |           | 816.4051 | 816.4085  | 861.4067 | 4.14       | 4.14           | 99.44      | 99.23       | 99.66         | 18  |
|      | C51 H60 O7 S      | C52 H61 O9 S      | 99.64 |           | 816.4051 | 816.406   | 861.4042 | 1.05       | 1.05           | 99.96      | 99.02       | 99.74         | 22  |
|      | C46 H60 N2 O9 S   | C47 H61 N2 O11 S  | 99.63 |           | 816.4051 | 816.402   | 861.4002 | -3.9       | 3.9            | 99.5       | 99.74       | 99.76         | 18  |
|      | C42 H60 N2 O14    | C43 H61 N2 O16    | 99.55 |           | 816.4051 | 816.4045  | 861.4027 | -0.81      | 0.81           | 99.98      | 98.71       | 99.69         | 14  |
|      | C52 H56 N4 O3 S   | C53 H57 N4 O5 S   | 99.38 |           | 816.4051 | 816.4073  | 861.4055 | 2.66       | 2.66           | 99.77      | 98.41       | 99.77         | 27  |
|      | C39 H64 N2 O14 S  | C40 H65 N2 O16 S  | 99.29 |           | 816.4051 | 816.4078  | 861.406  | 3.29       | 3.29           | 99.65      | 98.33       | 99.75         | 9   |
|      | C43 H64 N2 O9 S2  | C44 H65 N2 O11 S2 | 99.14 |           | 816.4052 | 816.4053  | 861.4035 | 0.21       | 0.21           | 100        | 97.25       | 99.69         | 13  |
|      | C54 H56 O7        | C55 H57 O9        | 99.1  |           | 816.4051 | 816.4026  | 861.4008 | -3.06      | 3.06           | 99.69      | 97.64       | 99.65         | 27  |
|      | C48 H56 N4 O8     | C49 H57 N4 O10    | 99.05 |           | 816.4051 | 816.4098  | 861.408  | 5.75       | 5.75           | 98.82      | 98.7        | 99.71         | 23  |
|      | C55 H52 N4 O3     | C56 H53 N4 O5     | 98.87 |           | 816.4051 | 816.4029  | 861.4021 | -1.44      | 1.44           | 99.83      | 96.41       | 99.69         | 32  |
|      | C48 H64 O7 S2     | C49 H65 O9 S2     | 98.71 |           | 816.4051 | 816.4093  | 861.4075 | 5.15       | 5.15           | 99.13      | 97.19       | 99.71         | 17  |
|      | C34 H64 N4 O15 S  | C35 H65 N4 O18 S  | 98.62 |           | 816.4052 | 816.4038  | 861.402  | -1.66      | 1.66           | 99.91      | 95.54       | 99.75         | 5   |
|      | C55 H60 O2 S2     | C56 H61 O4 S2     | 98.56 |           | 816.4051 | 816.4035  | 861.4017 | -2.03      | 2.03           | 99.86      | 95.4        | 99.73         | 26  |
|      | C37 H60 N4 O16    | C38 H61 N4 O18    | 98.5  |           | 816.4051 | 816.4004  | 861.3986 | -5.75      | 5.75           | 98.82      | 96.77       | 99.73         | 10  |
|      | C38 H64 N4 O11 S2 | C39 H65 N4 O13 S2 | 98.45 |           | 816.4052 | 816.4013  | 861.3996 | -4.74      | 4.74           | 99.27      | 96.06       | 99.67         | 9   |
|      | C60 H52 N2 O      | C61 H53 N2 O3     | 98.09 |           | 816.4051 | 816.408   | 861.4062 | 3.5        | 3.5            | 99.6       | 94.27       | 99.66         | 36  |
|      | C33 H68 O20 S     | C34 H69 O22 S     | 97.82 |           | 816.4051 | 816.4025  | 861.4007 | -3.26      | 3.26           | 99.65      | 93.2        | 99.71         | 0   |
|      | C30 H64 N4 O21    | C31 H65 N4 O23    | 97.13 |           | 816.4051 | 816.4053  | 861.4045 | 1.44       | 1.44           | 99.93      | 90.27       | 99.75         | 1   |
|      | C31 H68 N4 O16 S2 | C32 H69 N4 O18 S2 | 97.12 |           | 816.4052 | 816.4072  | 861.4054 | 2.44       | 2.44           | 99.8       | 90.56       | 99.82         | 0   |

Figure S20. (+)-HRESIMS data of Xanthanoltrimer B (2)

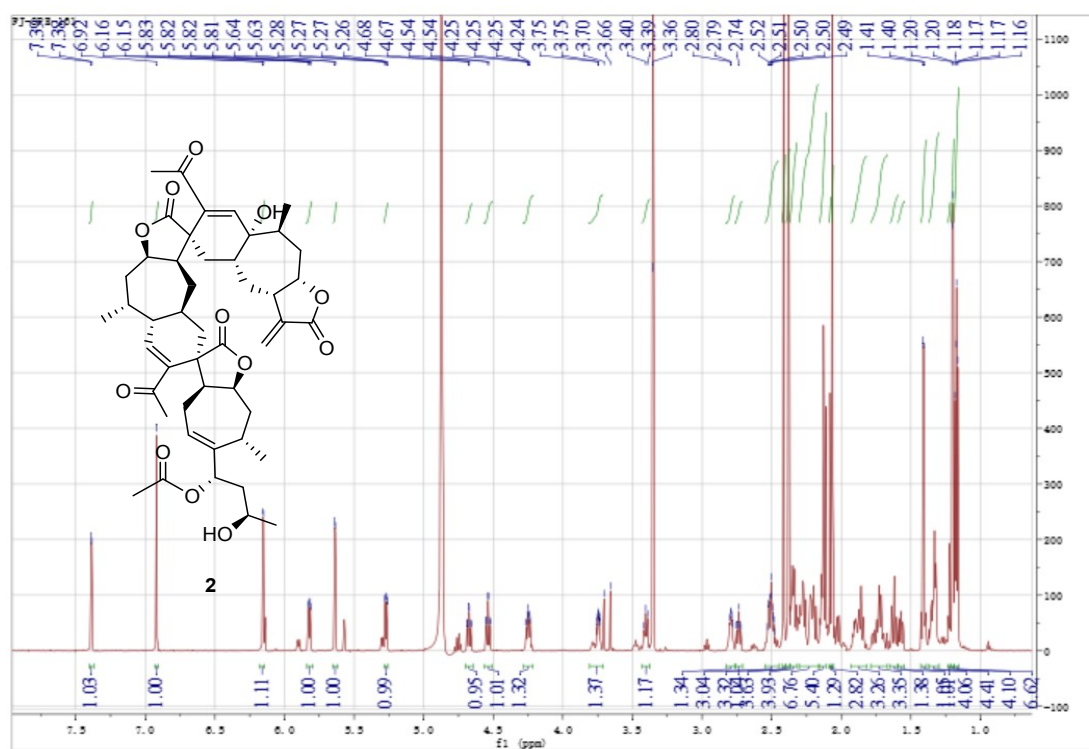

Figure S21. <sup>1</sup>H-NMR spectrum of Xanthanoltrimer B (2) (800 MHz, in CD<sub>3</sub>OD)

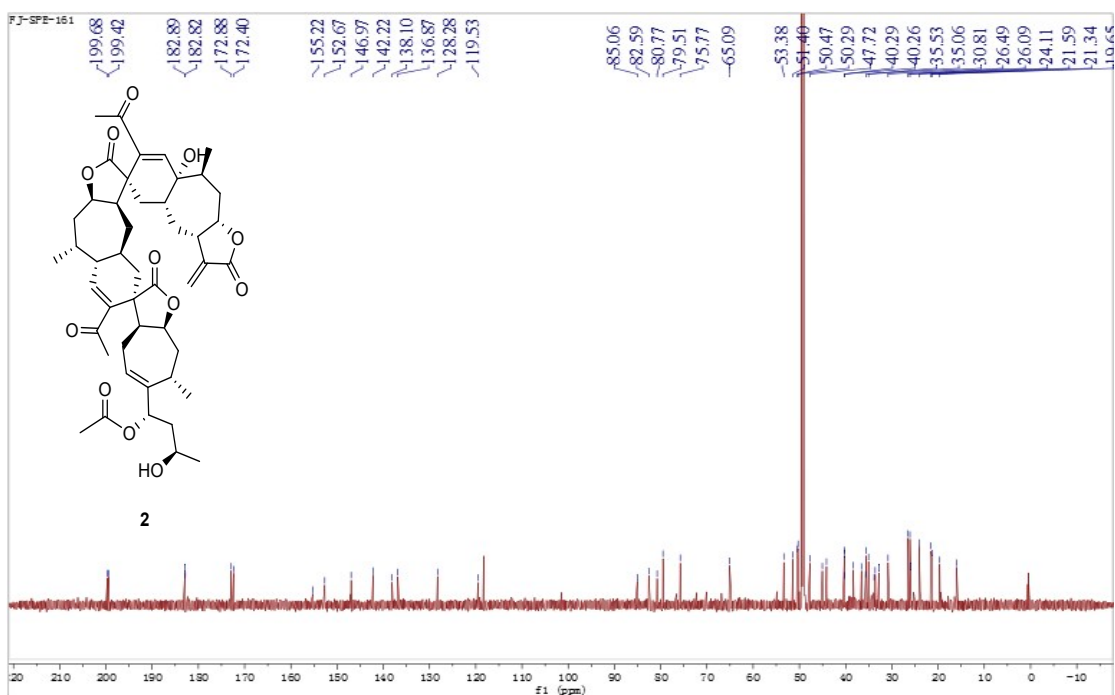

**Figure S22.** <sup>13</sup>C-NMR spectrum of Xanthanoltrimer B (**2**) (200 MHz, in CD<sub>3</sub>OD)

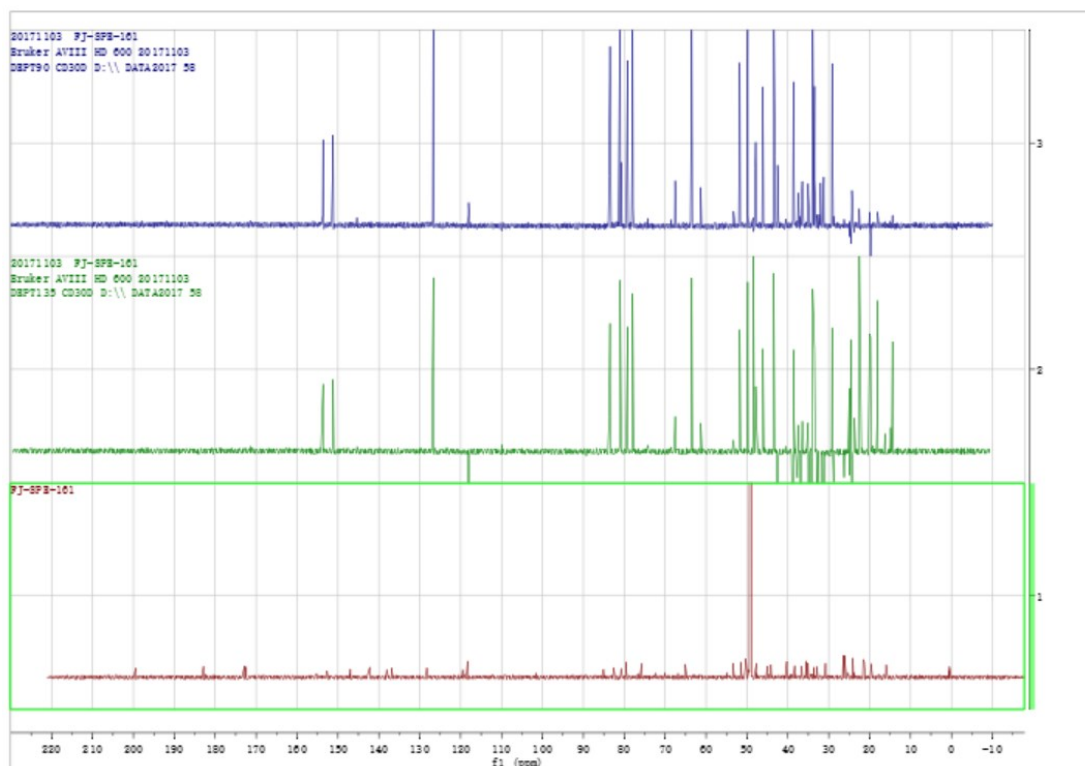

**Figure S23.** DEPT spectrum of Xanthanoltrimer B (**2**) (150 MHz, in CD<sub>3</sub>OD)

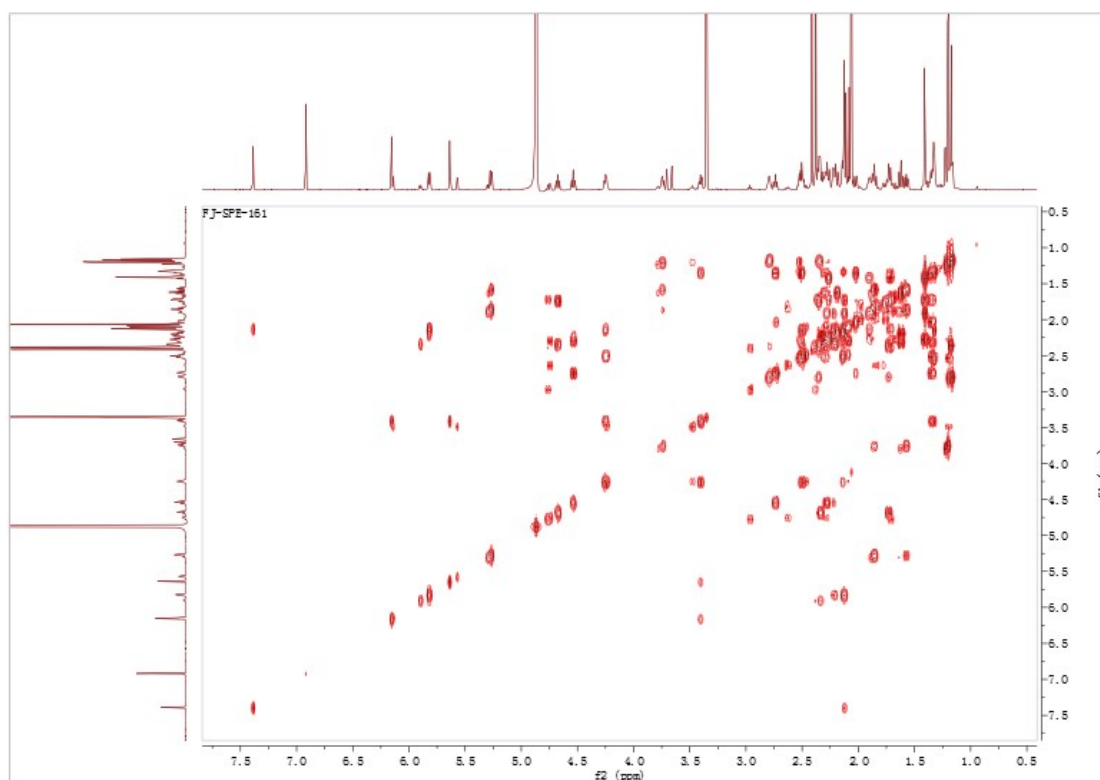

**Figure S24.**  $^1\text{H}$ - $^1\text{H}$  COSY spectrum of Xanthanoltrimer B (**2**) (800 MHz, in  $\text{CD}_3\text{OD}$ )

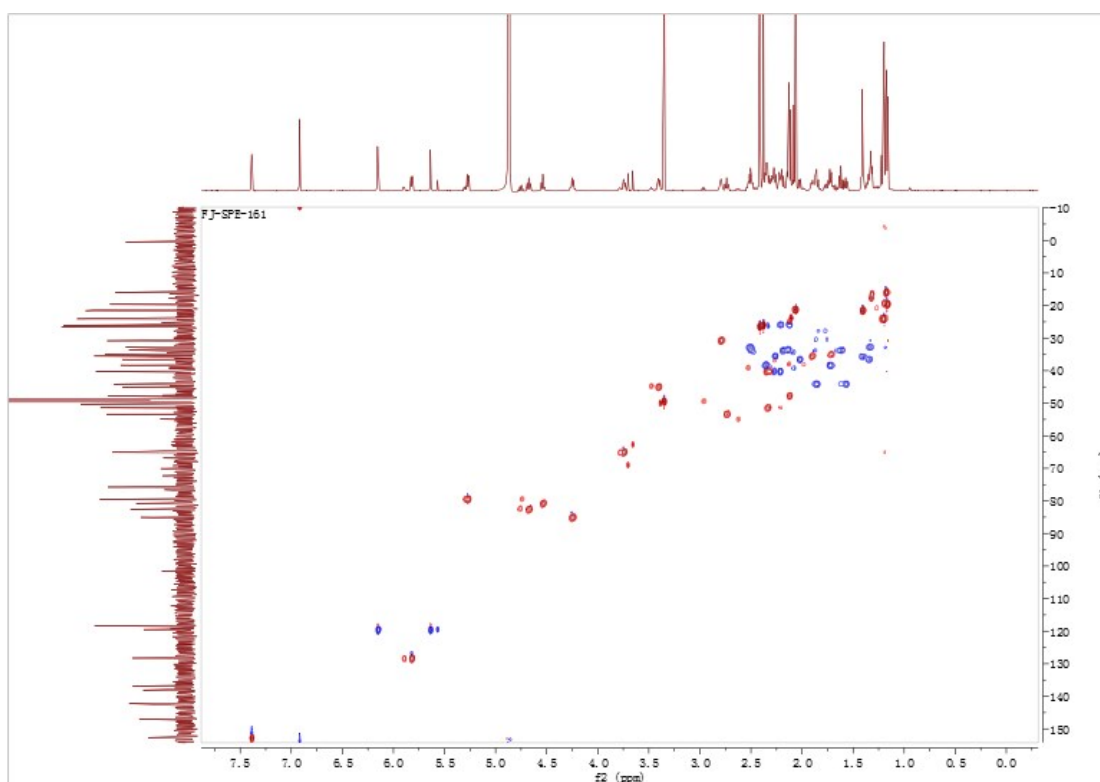

**Figure S25.** HSQC spectrum of Xanthanoltrimer B (**2**)

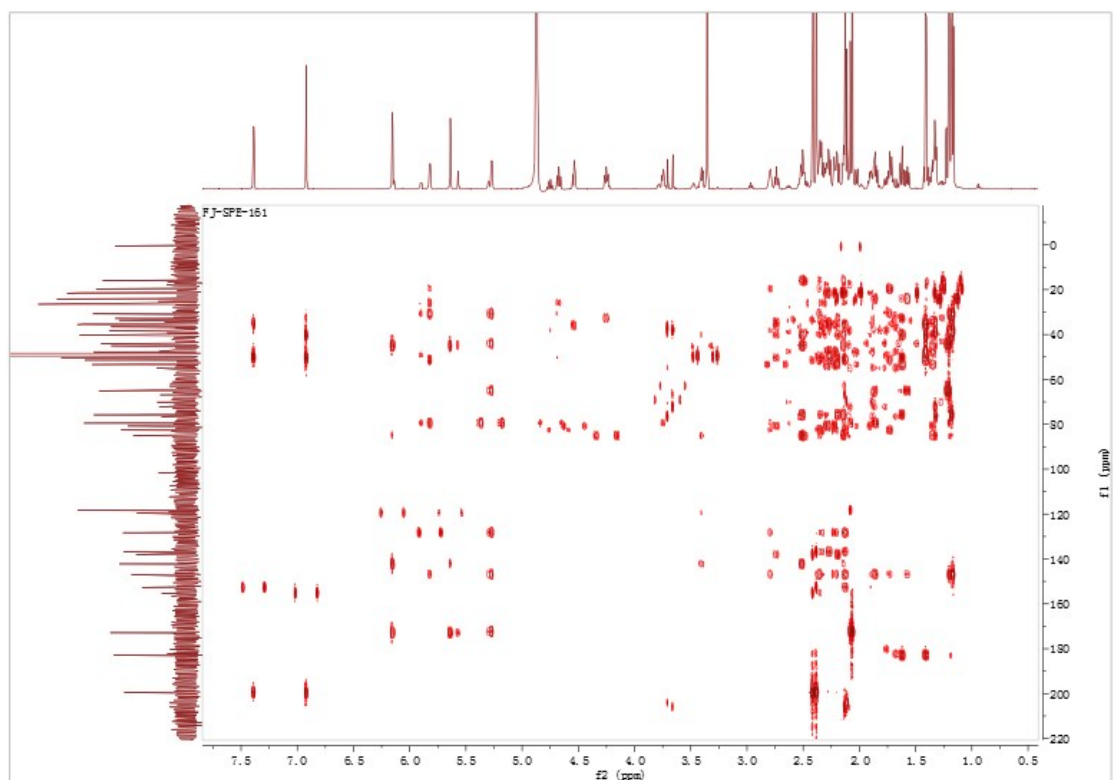

**Figure S26.** HMBC spectrum of Xanthanoltrimer B (**2**)

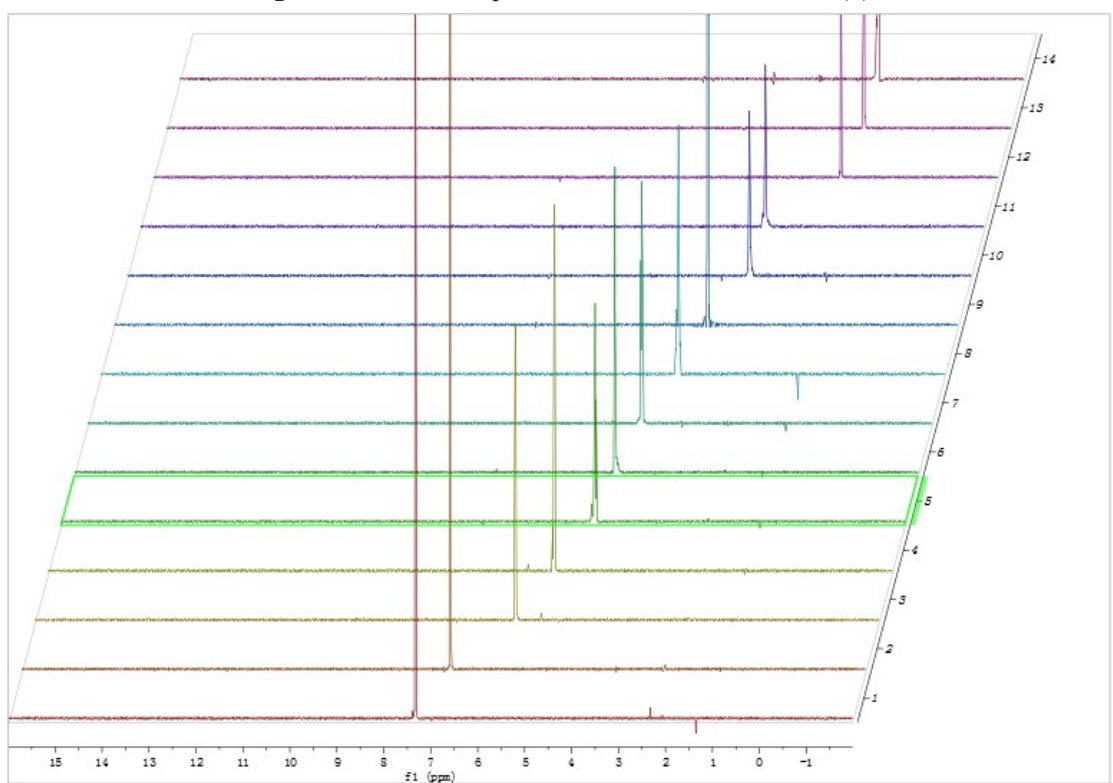

**Figure S27.** NOE spectrum of Xanthanoltrimer B (**2**) (600 MHz, in CD<sub>3</sub>OD)



VNS-600 NOESY1D FJ-SPE-161 IN od3od Nov 13 2017

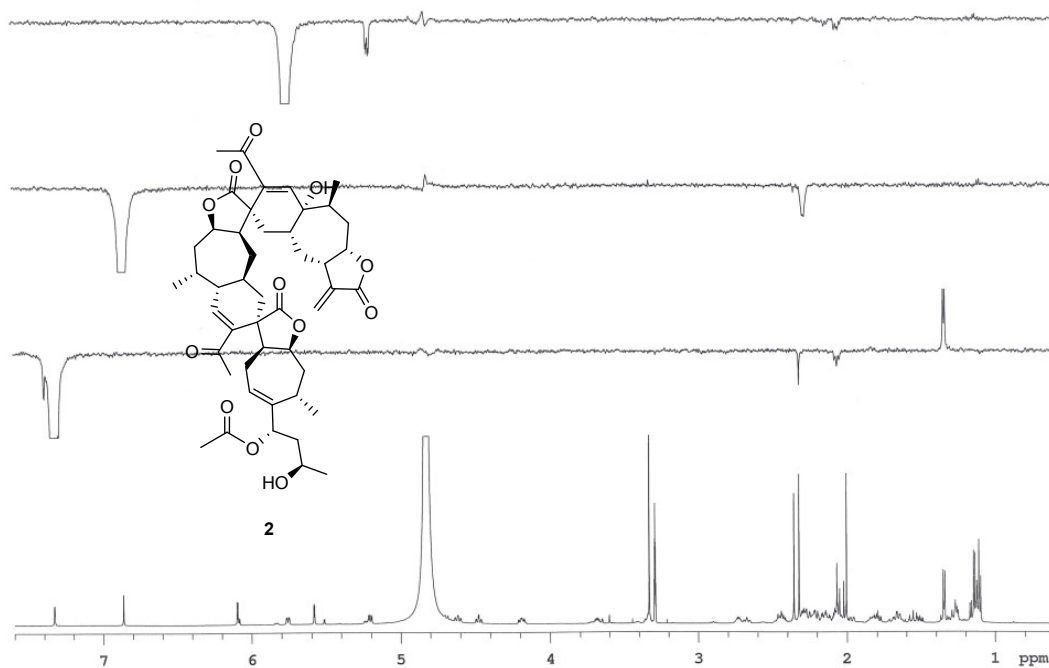

**Figure S28.** NOE spectrum of Xanthanoltrimer B (**2**) (600 MHz, in CD<sub>3</sub>OD)

VNS-600 NOESY1D FJ-SPE-161 IN od3od Nov 13 2017

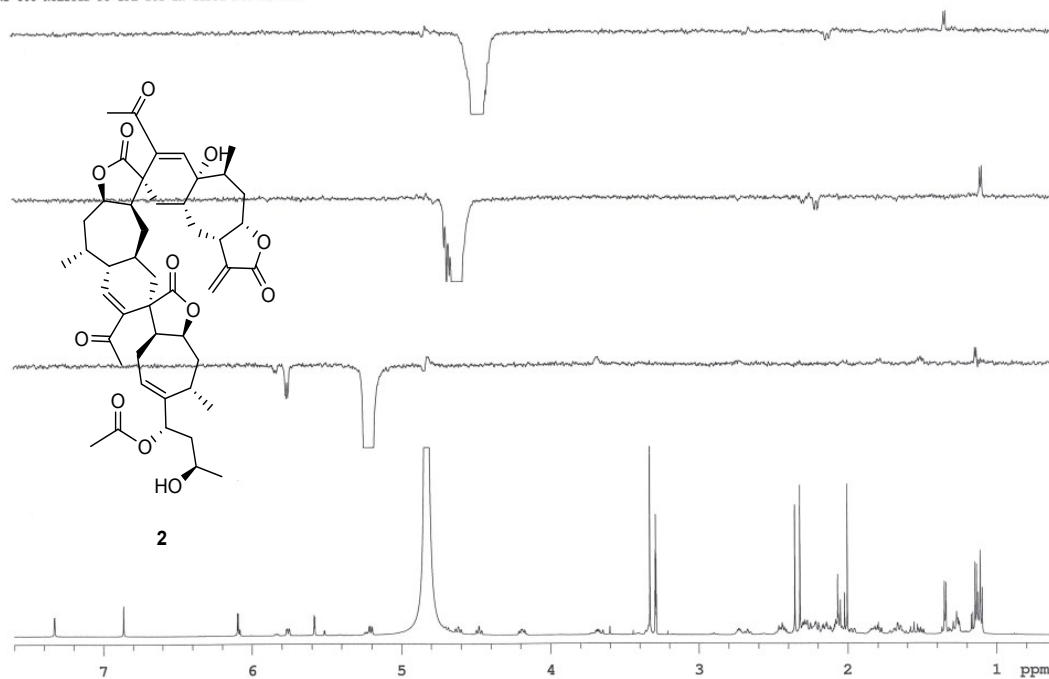

**Figure S29.** NOE spectrum of Xanthanoltrimer B (**2**) (600 MHz, in CD<sub>3</sub>OD)

VNS-600 NOESY1D FJ-SPE-161 IN cd3od Nov 13 2017

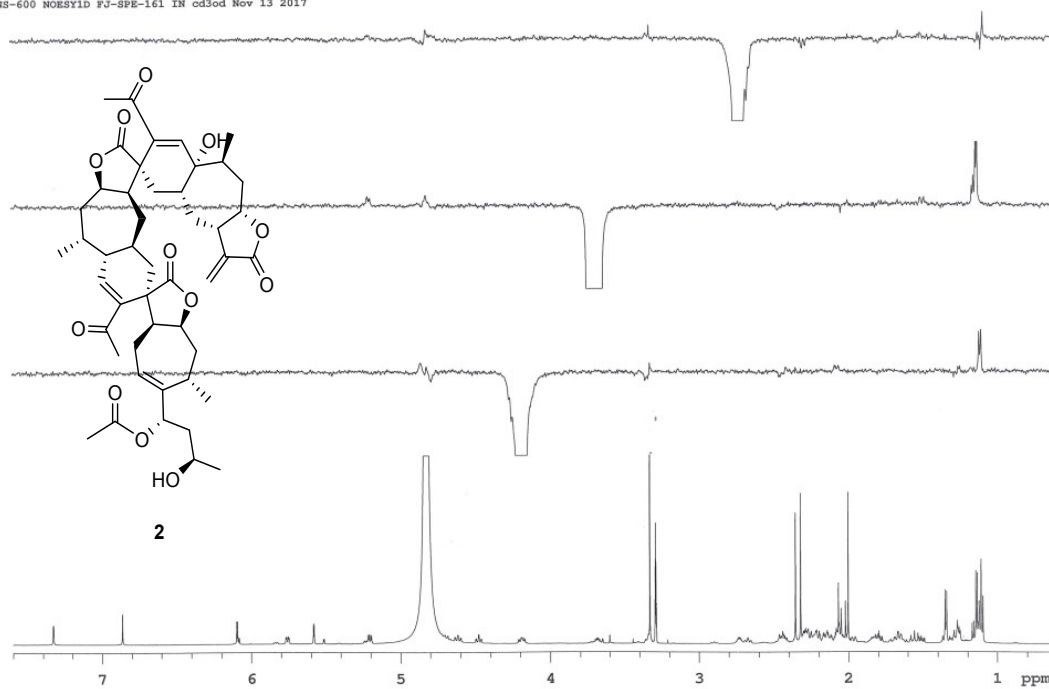

**Figure S30.** NOE spectrum of Xanthanoltrimer B (**2**) (600 MHz, in CD<sub>3</sub>OD)

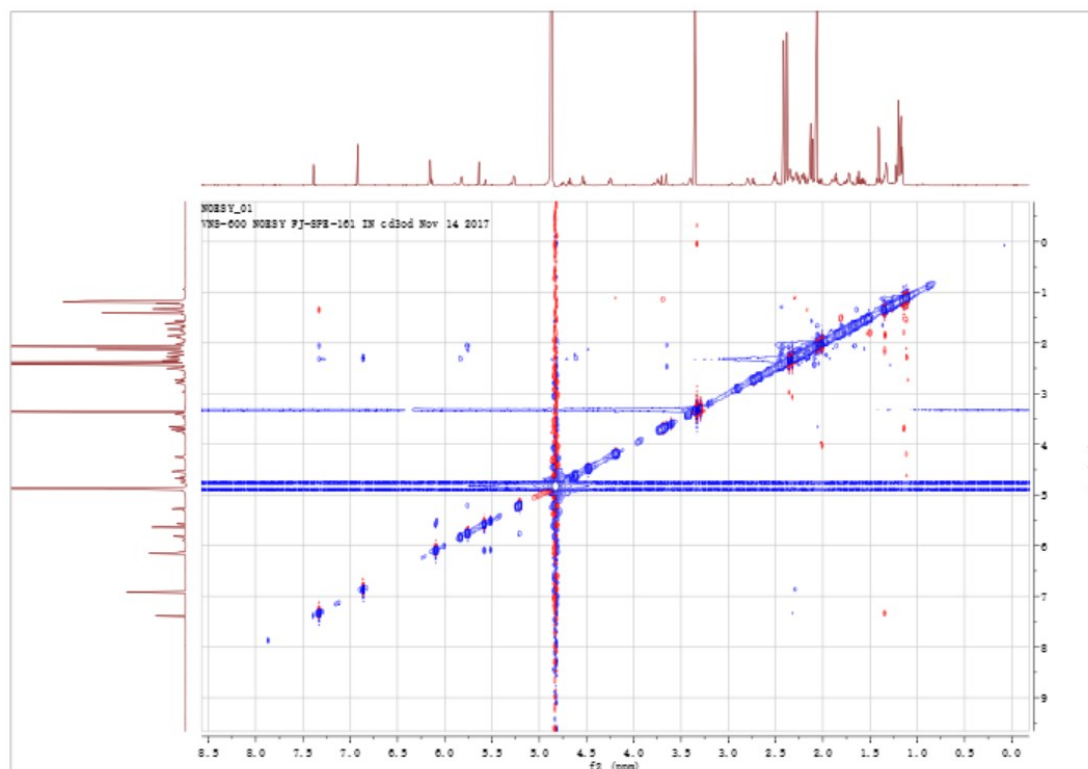

**Figure S31.** NOESY spectrum of Xanthanoltrimer B (**2**) (600 MHz, in CD<sub>3</sub>OD)

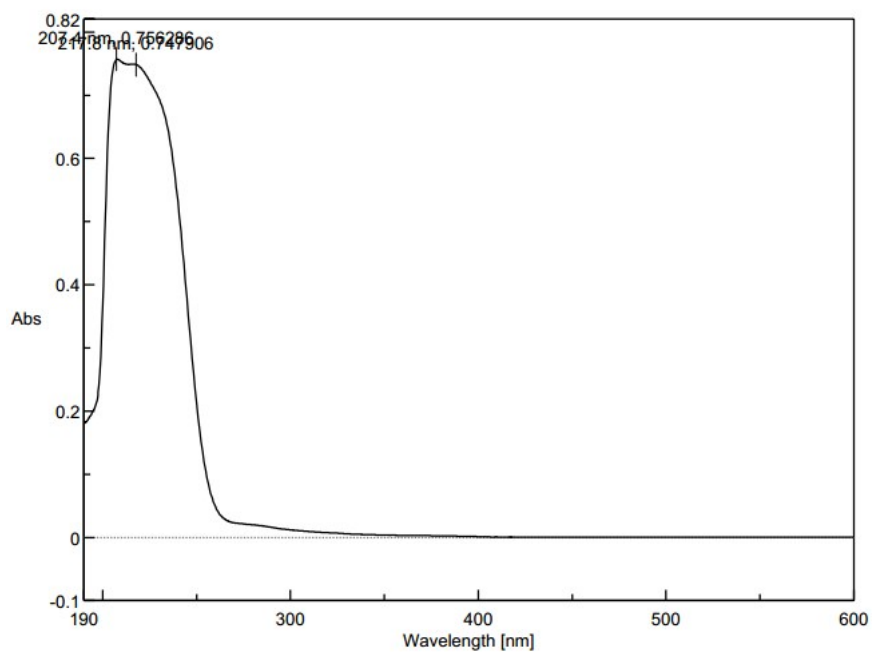

**Figure S32.** Experimental UV spectrum of Xanthanoltrimer B (**2**) in MeOH

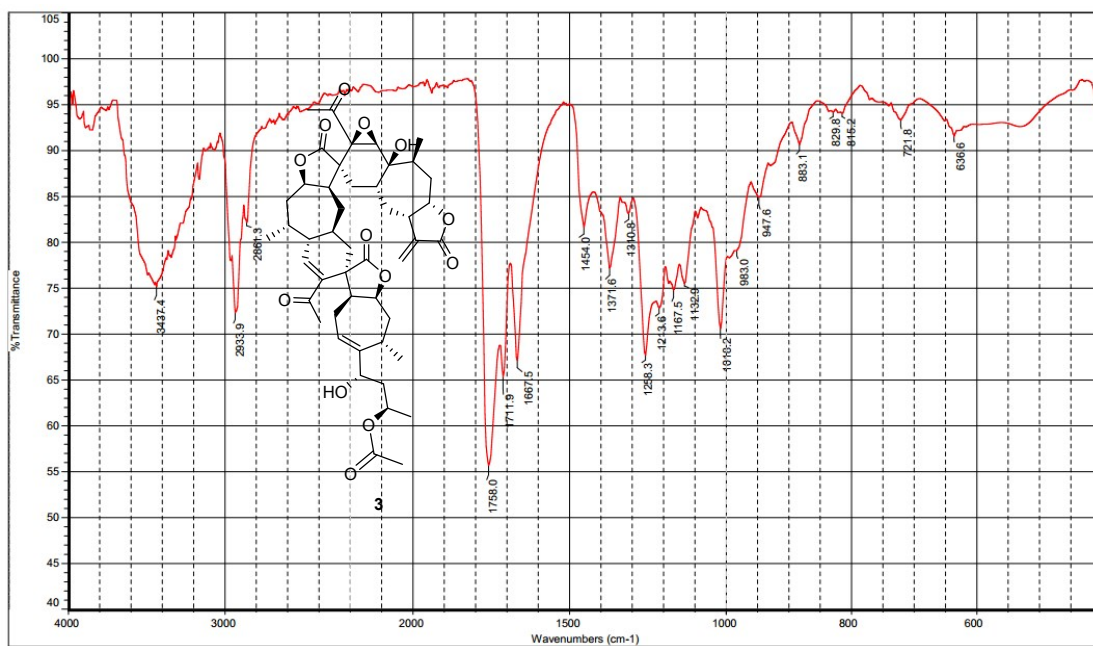

**Figure S33.** IR spectrum of Xanthanoltrimer C (**3**)

MS Formula Results: + Scan (7.751 min) Sub (2017112402.d)

| m/z     | Ion                 | Formula           | Abundance |           |          |           |          |            |                |            |             |               |     |
|---------|---------------------|-------------------|-----------|-----------|----------|-----------|----------|------------|----------------|------------|-------------|---------------|-----|
| 855.937 | (M+Na) <sup>+</sup> | C47 H60 Na O13    | 139555    |           |          |           |          |            |                |            |             |               |     |
| Best    | Formula (M)         | Ion Formula       | Score     | Cross Sco | Mass     | Calc Mass | Calc m/z | Diff (ppm) | Abs Diff (ppm) | Mass Match | Abund Match | Spacing Match | DBE |
| ✓       | C47 H60 O13         | C47 H60 Na O13    | 99.91     |           | 832.4044 | 832.4034  | 855.3926 | -1.21      | 1.21           | 99.95      | 99.79       | 99.97         | 18  |
| ✓       | C48 H56 N4 O9       | C48 H56 Na O9     | 99.91     |           | 832.4044 | 832.4047  | 855.394  | 0.37       | 0.37           | 100        | 99.7        | 99.98         | 23  |
| ✓       | C52 H56 N4 O4 S     | C52 H56 Na O4 S   | 99.51     |           | 832.4044 | 832.4022  | 855.3914 | -2.65      | 2.65           | 99.76      | 98.72       | 99.97         | 27  |
| ✓       | C45 H60 N4 O9 S     | C45 H60 Na O9 S   | 99.46     |           | 832.4044 | 832.4081  | 855.3973 | 4.4        | 4.4            | 99.33      | 99.26       | 99.95         | 18  |
| ✓       | C44 H64 O13 S       | C44 H64 Na O13 S  | 99.43     |           | 832.4044 | 832.4088  | 855.396  | 2.82       | 2.82           | 99.73      | 98.52       | 99.95         | 13  |
| ✓       | C51 H60 O8 S        | C51 H60 Na O8 S   | 99.4      |           | 832.4044 | 832.4009  | 855.3901 | -4.24      | 4.24           | 99.38      | 98.96       | 99.97         | 22  |
| ✓       | C53 H56 N2 O7       | C53 H56 Na O7     | 99.27     |           | 832.4044 | 832.4088  | 855.398  | 5.22       | 5.22           | 99.06      | 99.02       | 99.97         | 27  |
| ✓       | C57 H56 N2 O2 S     | C57 H56 Na O2 S   | 99.08     |           | 832.4044 | 832.4062  | 855.3955 | 2.19       | 2.19           | 99.83      | 97.07       | 99.98         | 31  |
| ✓       | C42 H60 N2 O15      | C42 H60 Na O15    | 99        |           | 832.4044 | 832.3994  | 855.3886 | -6.06      | 6.06           | 98.74      | 98.63       | 99.98         | 14  |
| ✓       | C39 H64 N2 O15 S    | C39 H64 Na O15 S  | 98.94     |           | 832.4044 | 832.4027  | 855.392  | -2.03      | 2.03           | 99.86      | 96.59       | 99.97         | 9   |
| ✓       | C49 H60 N4 O4 S2    | C49 H60 Na O4 S2  | 98.85     |           | 832.4045 | 832.4056  | 855.3948 | 1.38       | 1.38           | 99.93      | 96.19       | 99.85         | 22  |
| ✓       | C60 H52 N2 O2       | C60 H52 Na O2     | 98.82     |           | 832.4044 | 832.4029  | 855.3921 | -1.84      | 1.84           | 99.88      | 96.08       | 99.96         | 36  |
| ✓       | C48 H64 O8 S2       | C48 H64 Na O8 S2  | 98.75     |           | 832.4044 | 832.4043  | 855.3935 | -0.2       | 0.2            | 100        | 95.74       | 99.85         | 17  |
| ✓       | C55 H52 N4 O4       | C55 H52 Na O4     | 98.71     |           | 832.4044 | 832.3989  | 855.3881 | -6.68      | 6.68           | 98.47      | 98.06       | 99.97         | 32  |
| ✓       | C40 H64 O18         | C40 H64 Na O18    | 98.66     |           | 832.4044 | 832.4093  | 855.3985 | 5.85       | 5.85           | 98.82      | 97.28       | 99.98         | 9   |
| ✓       | C41 H60 N4 O14      | C41 H60 Na O14    | 98.64     |           | 832.4044 | 832.4106  | 855.3998 | 7.42       | 7.42           | 98.11      | 98.4        | 99.99         | 14  |
| ✓       | C54 H56 O8          | C54 H56 Na O8     | 98.59     |           | 832.4044 | 832.3975  | 855.3867 | -8.26      | 8.26           | 97.67      | 98.99       | 99.96         | 27  |
| ✓       | C46 H60 N2 O10 S    | C46 H60 Na O10 S  | 98.42     |           | 832.4044 | 832.3969  | 855.3861 | -9.08      | 9.08           | 97.19      | 99.18       | 99.95         | 18  |
| ✓       | C50 H60 N2 O7 S     | C50 H60 Na O7 S   | 98.36     |           | 832.4044 | 832.4121  | 855.4013 | 9.25       | 9.25           | 97.09      | 99.14       | 99.97         | 22  |
| ✓       | C43 H64 N2 O10 S2   | C43 H64 Na O10 S2 | 98.17     |           | 832.4044 | 832.4002  | 855.3895 | -5.06      | 5.06           | 99.12      | 95.22       | 99.8          | 13  |
| ✓       | C35 H64 N2 O20      | C35 H64 Na O20    | 98.12     |           | 832.4044 | 832.4052  | 855.3945 | 1          | 1              | 99.97      | 93.49       | 99.99         | 5   |
| ✓       | C54 H60 N2 O2 S2    | C54 H60 Na O2 S2  | 97.94     |           | 832.4044 | 832.4096  | 855.3986 | 6.23       | 6.23           | 98.67      | 95.1        | 99.89         | 26  |
| ✓       | C58 H56 O5          | C58 H56 Na O5     | 97.62     |           | 832.4044 | 832.4128  | 855.402  | 10.06      | 10.06          | 96.56      | 97.46       | 99.96         | 31  |
| ✓       | C55 H60 O3 S2       | C55 H60 Na O3 S2  | 97.62     |           | 832.4044 | 832.3984  | 855.3876 | -7.26      | 7.26           | 98.2       | 94.74       | 99.9          | 26  |
| ✓       | C46 H60 N2 O12      | C46 H60 Na O12    | 97.49     |           | 832.4044 | 832.4146  | 855.4038 | 12.27      | 12.27          | 94.93      | 99.69       | 99.98         | 18  |
| ✓       | C42 H64 N4 O9 S2    | C42 H64 Na O9 S2  | 97.48     |           | 832.4045 | 832.4115  | 855.4007 | 8.42       | 8.42           | 97.58      | 95.39       | 99.79         | 13  |
| ✓       | C41 H68 O13 S2      | C41 H68 Na O13 S2 | 97.43     |           | 832.4044 | 832.4101  | 855.3994 | 6.85       | 6.85           | 98.39      | 93.85       | 99.79         | 8   |
| ✓       | C36 H68 N2 O15 S2   | C36 H68 Na O15 S2 | 97.31     |           | 832.4045 | 832.4061  | 855.3953 | 1.99       | 1.99           | 99.86      | 91.04       | 99.73         | 4   |
| ✓       | C34 H64 N4 O17 S    | C34 H64 Na O17 S  | 97.19     |           | 832.4045 | 832.3987  | 855.3879 | -6.89      | 6.89           | 98.37      | 92.97       | 99.88         | 5   |
| ✓       | C49 H56 N2 O10      | C49 H56 Na O10    | 97.18     |           | 832.4044 | 832.3935  | 855.3827 | -13.11     | 13.11          | 94.23      | 99.76       | 99.97         | 23  |
| ✓       | C58 H56 O3 S        | C58 H56 Na O3 S   | 97.03     |           | 832.4044 | 832.395   | 855.3842 | -11.29     | 11.29          | 95.69      | 96.81       | 99.98         | 31  |
| ✓       | C37 H60 N4 O17      | C37 H60 Na O17    | 96.91     |           | 832.4044 | 832.3953  | 855.3846 | -10.91     | 10.91          | 95.97      | 95.89       | 99.99         | 10  |
| ✓       | C38 H64 N4 O14 S    | C38 H64 Na O14 S  | 96.87     |           | 832.4044 | 832.414   | 855.4032 | 11.44      | 11.44          | 95.57      | 96.49       | 99.91         | 9   |
| ✓       | C37 H68 O18 S       | C37 H68 Na O18 S  | 96.81     |           | 832.4044 | 832.4126  | 855.4019 | 9.87       | 9.87           | 96.69      | 94.42       | 99.91         | 4   |
| ✓       | C59 H52 N4 O        | C59 H52 Na O      | 96.72     |           | 832.4044 | 832.4141  | 855.4033 | 11.65      | 11.65          | 95.42      | 96.19       | 99.97         | 36  |
| ✓       | C32 H68 N2 O20 S    | C32 H68 Na O20 S  | 96.61     |           | 832.4044 | 832.4086  | 855.3978 | 5.02       | 5.02           | 99.13      | 89.7        | 99.87         | 0   |

Figure S34. (+)-HRESIMS data of Xanthanoltrimer C (3)

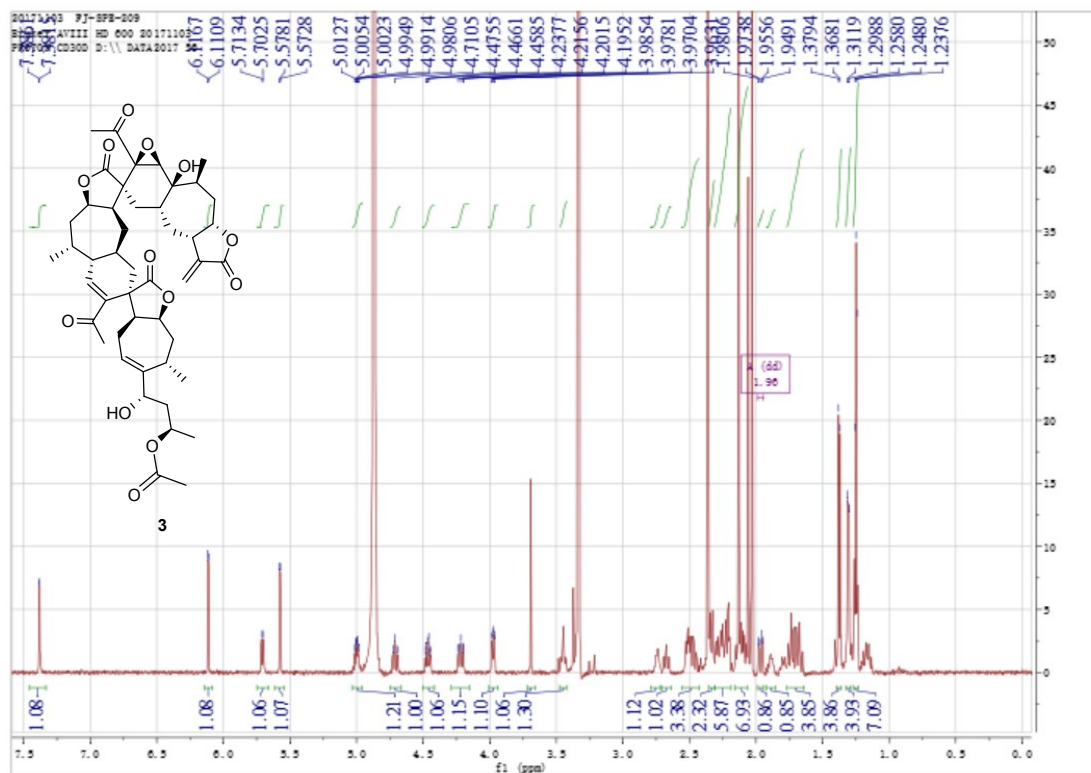

Figure S35. <sup>1</sup>H-NMR spectrum of Xanthanoltrimer C (3) (600 MHz, in CD<sub>3</sub>OD)

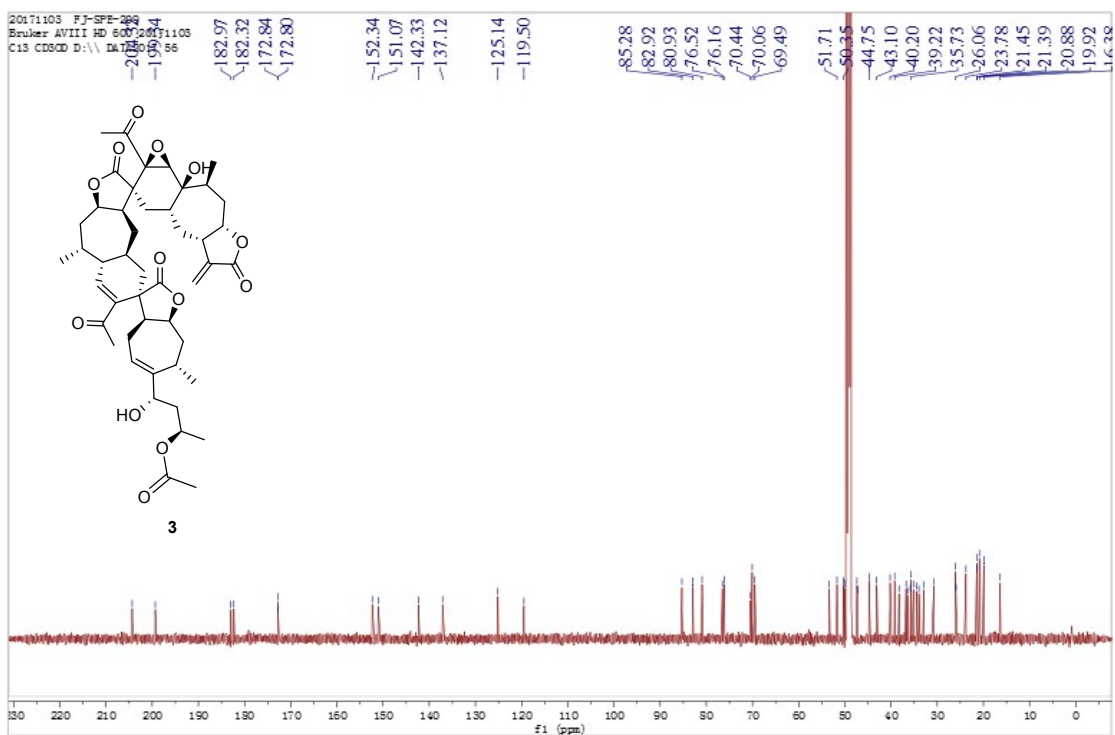

**Figure S36.** <sup>13</sup>C-NMR spectrum of Xanthanoltrimer C (**3**) (150 MHz, in CD<sub>3</sub>OD)

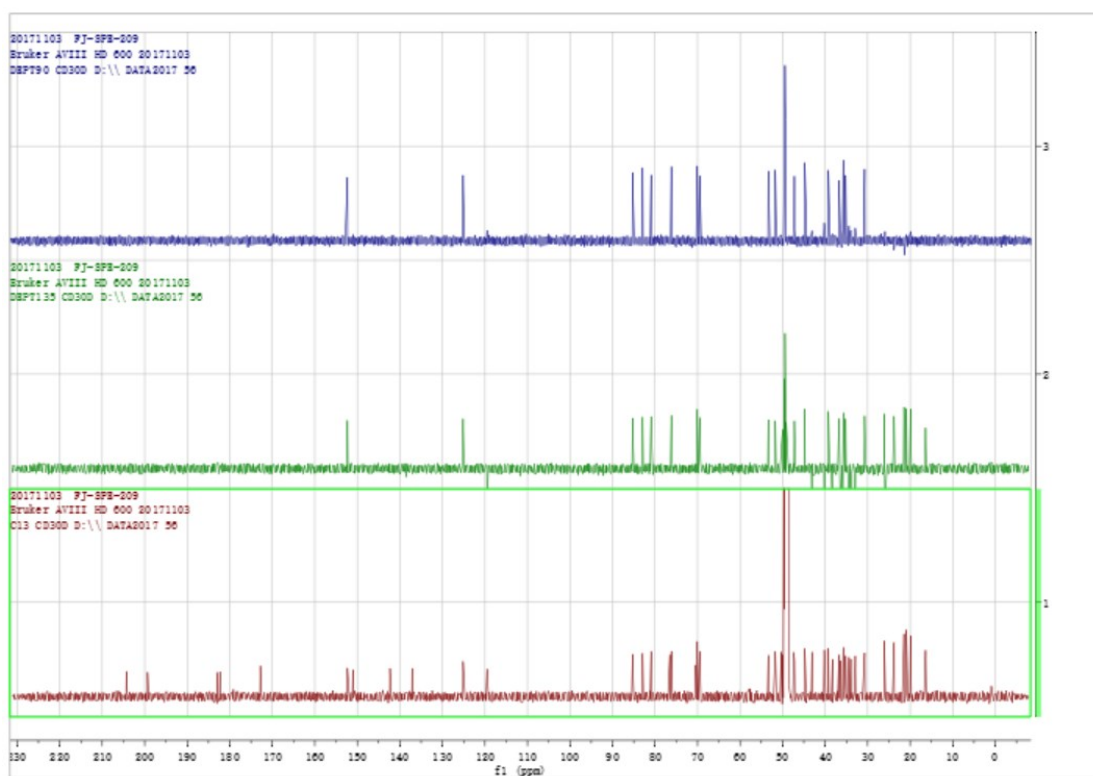

**Figure S37.** DEPT spectrum of Xanthanoltrimer C (**3**) (150 MHz, in CD<sub>3</sub>OD)

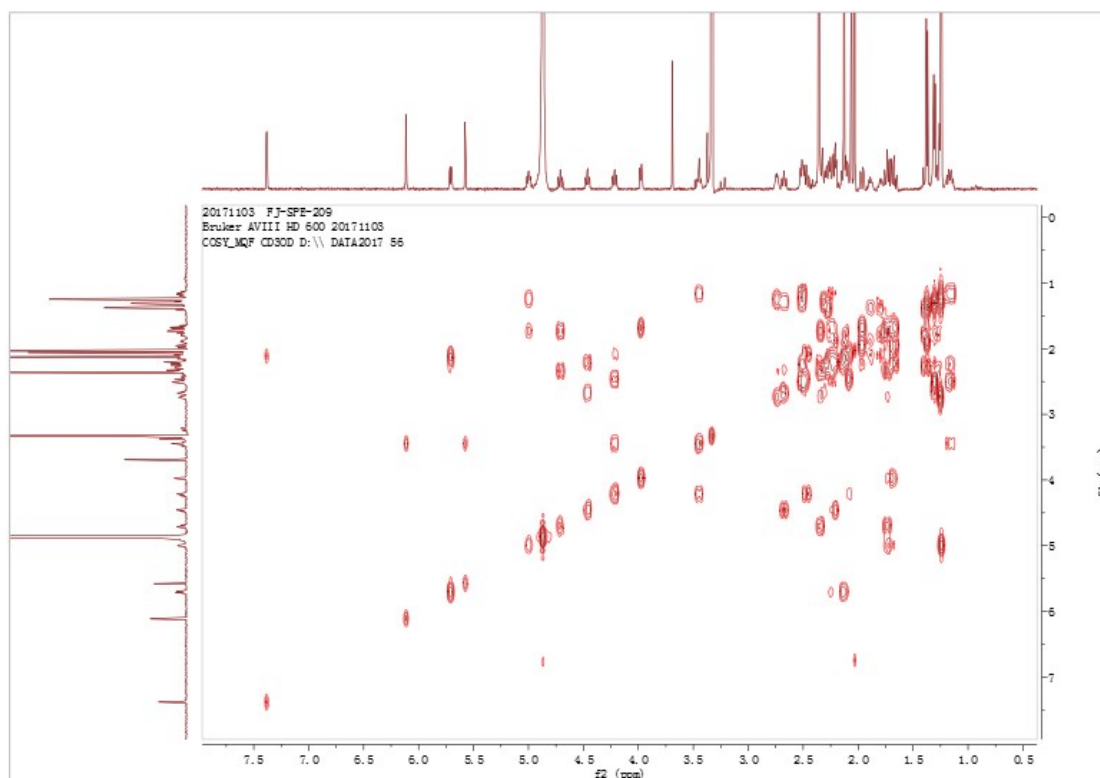

**Figure S38.**  $^1\text{H}$ - $^1\text{H}$  COSY spectrum of Xanthanoltrimer C (**3**) (600 MHz, in  $\text{CD}_3\text{OD}$ )

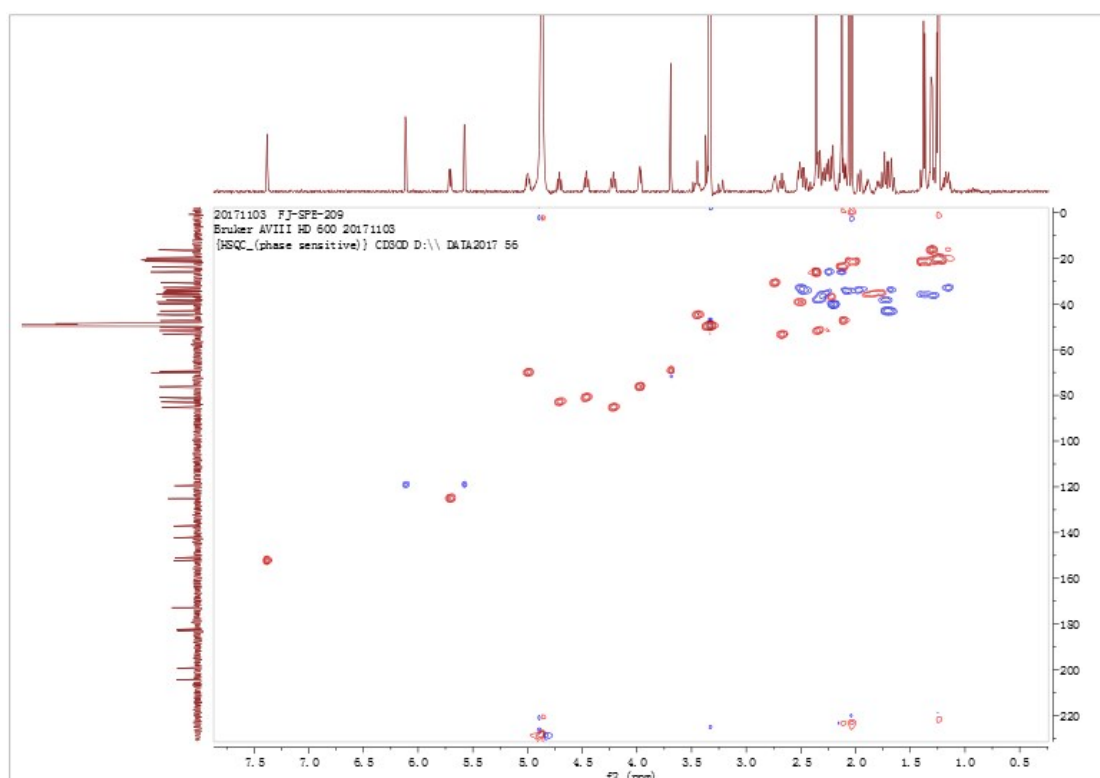

**Figure S39.** HSQC spectrum of Xanthanoltrimer C (**3**)

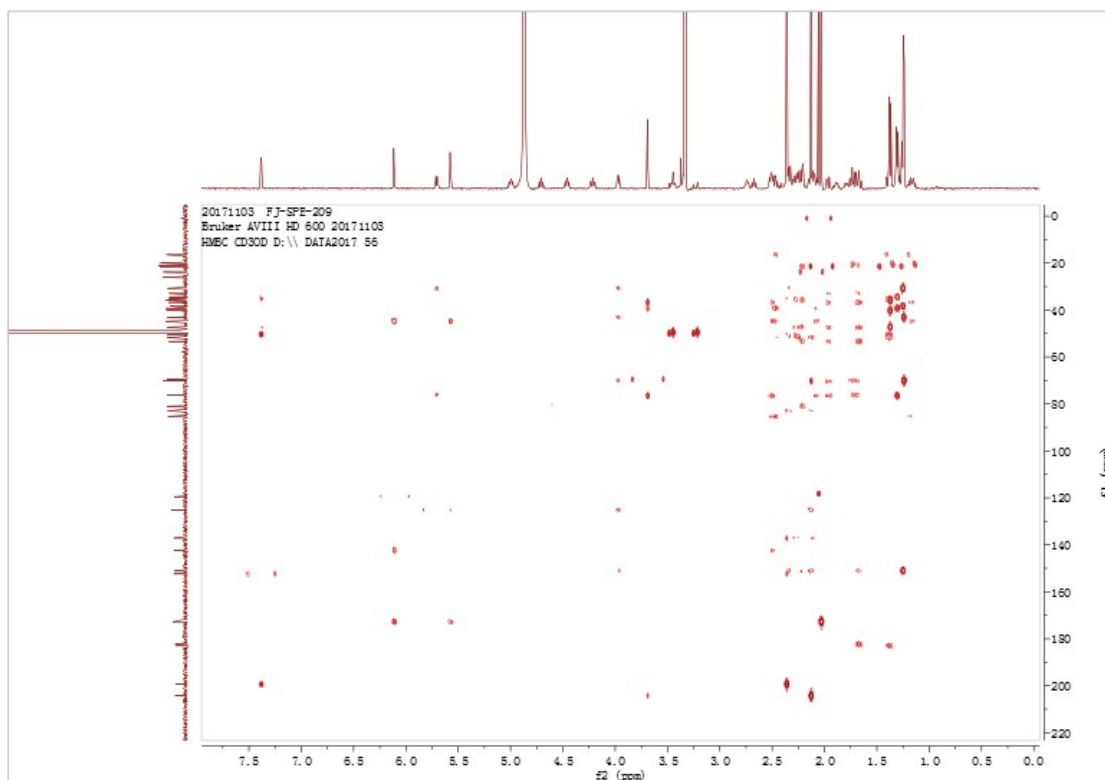

**Figure S40.** HMBC spectrum of Xanthanoltrimer C (**3**)

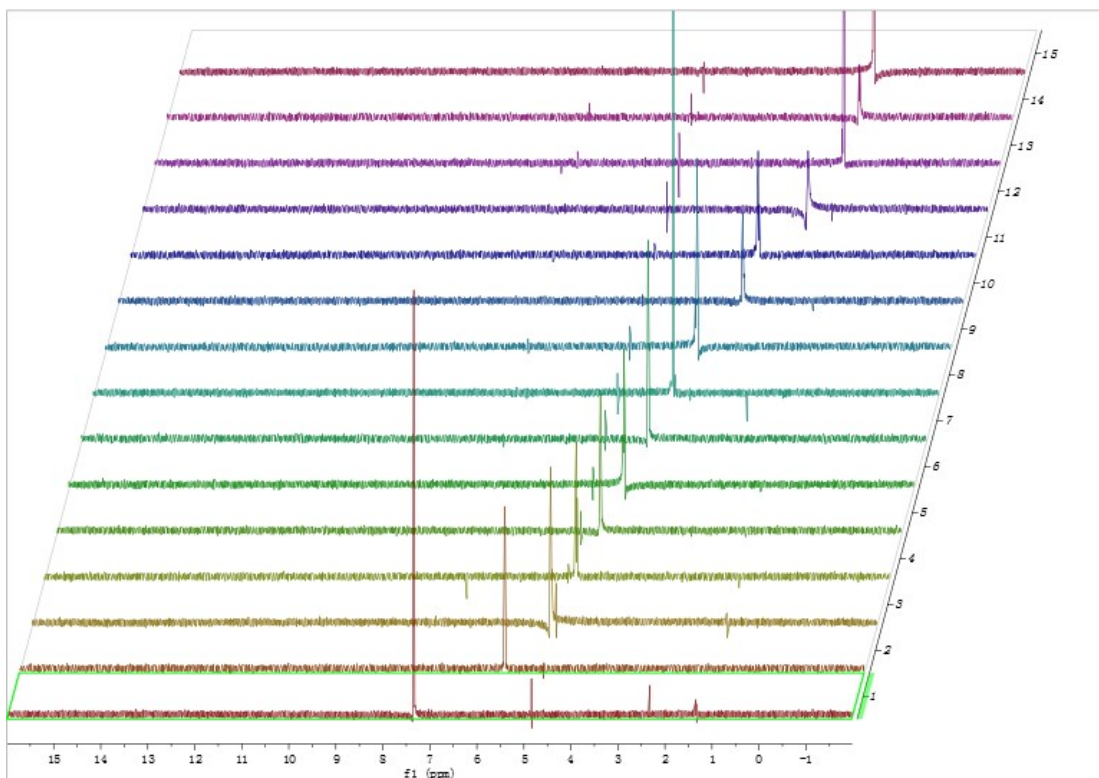

**Figure S41.** NOE spectrum of Xanthanoltrimer C (**3**) (600 MHz, in CD<sub>3</sub>OD)

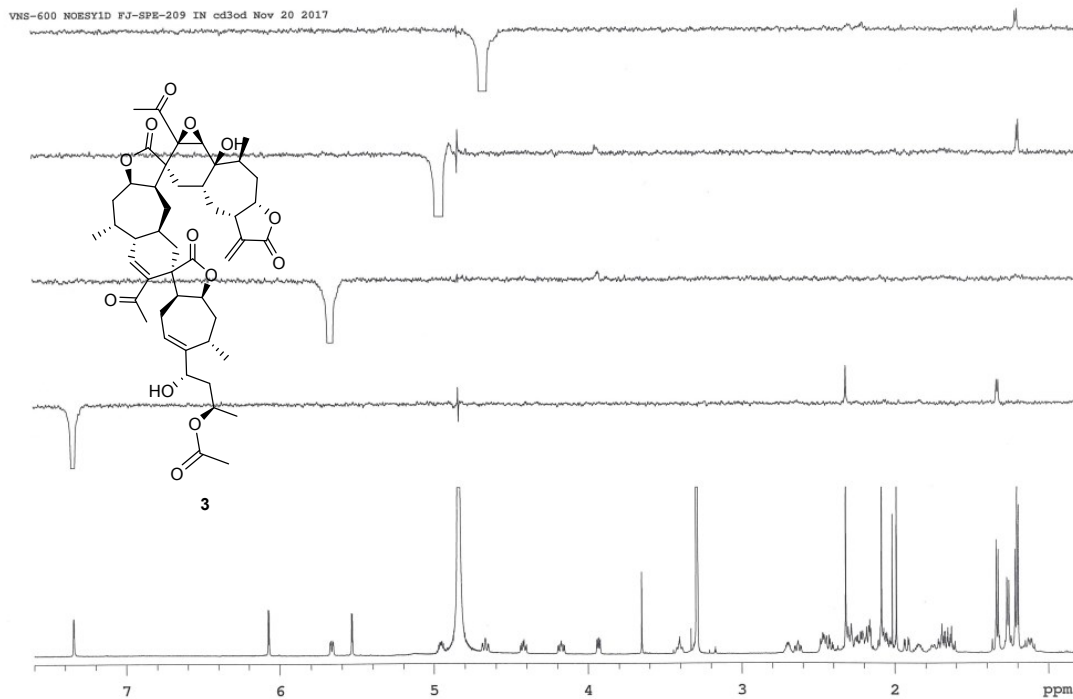

**Figure S42.** NOE spectrum of Xanthanoltrimer C (**3**) (600 MHz, in CD<sub>3</sub>OD)

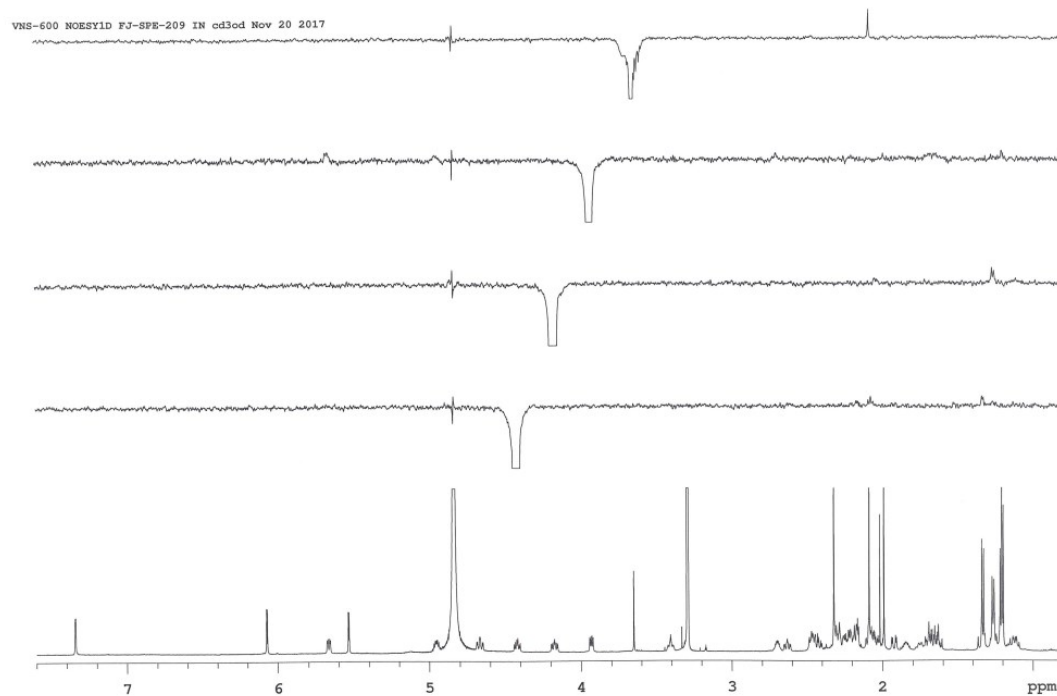

**Figure S43.** NOE spectrum of Xanthanoltrimer C (**3**) (600 MHz, in CD<sub>3</sub>OD)



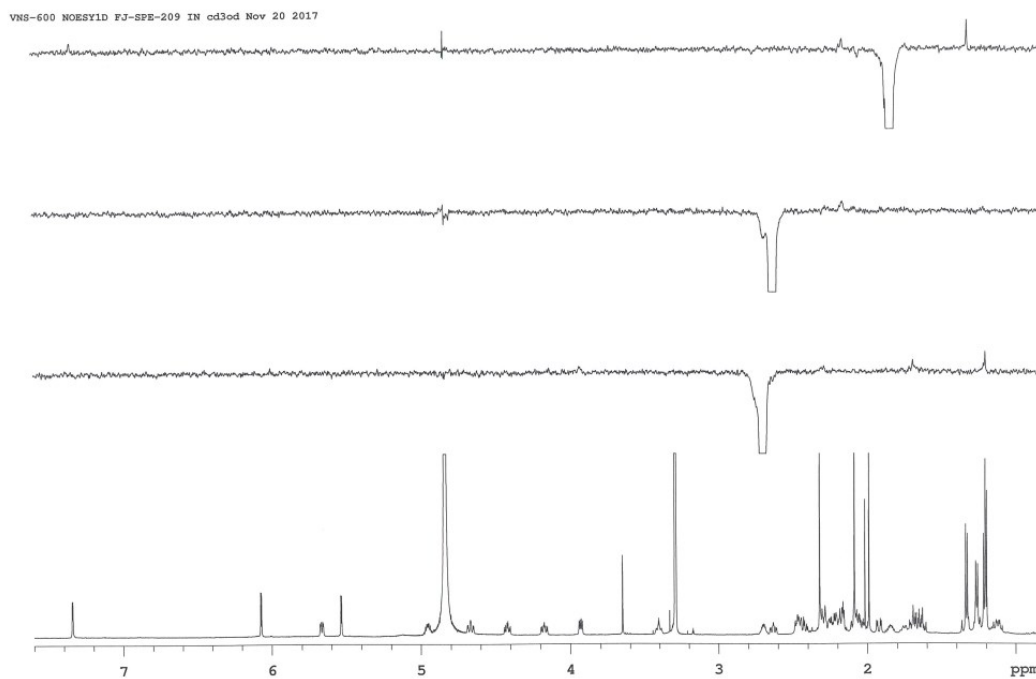

**Figure S44.** NOE spectrum of Xanthanoltrimer C (**3**) (600 MHz, in CD<sub>3</sub>OD)

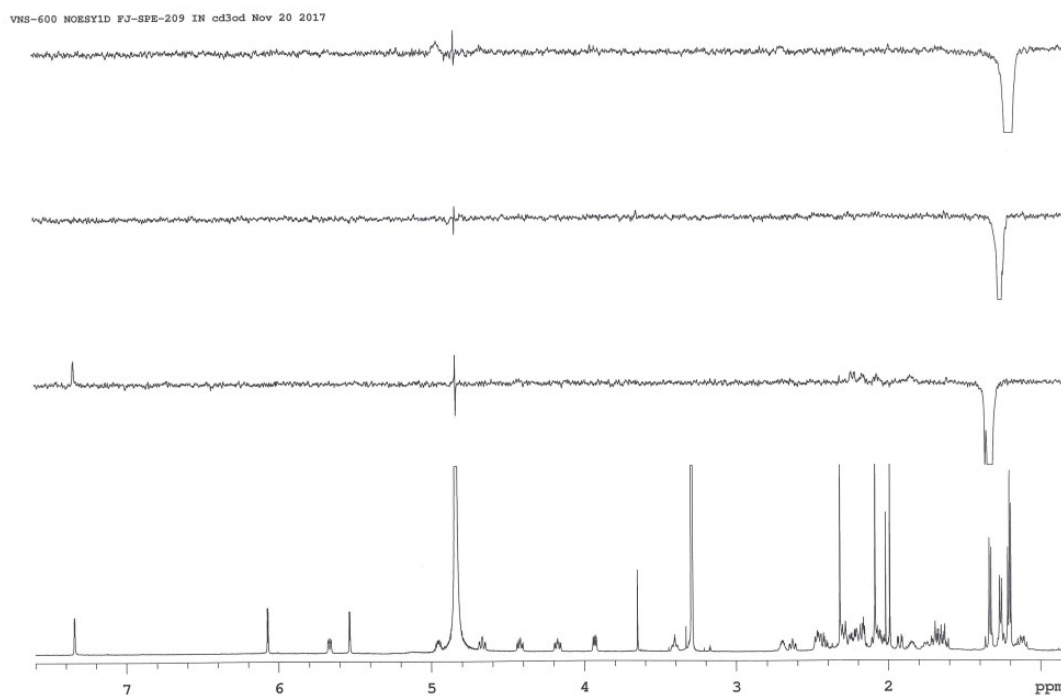

**Figure S45.** NOE spectrum of Xanthanoltrimer C (**3**) (600 MHz, in CD<sub>3</sub>OD)

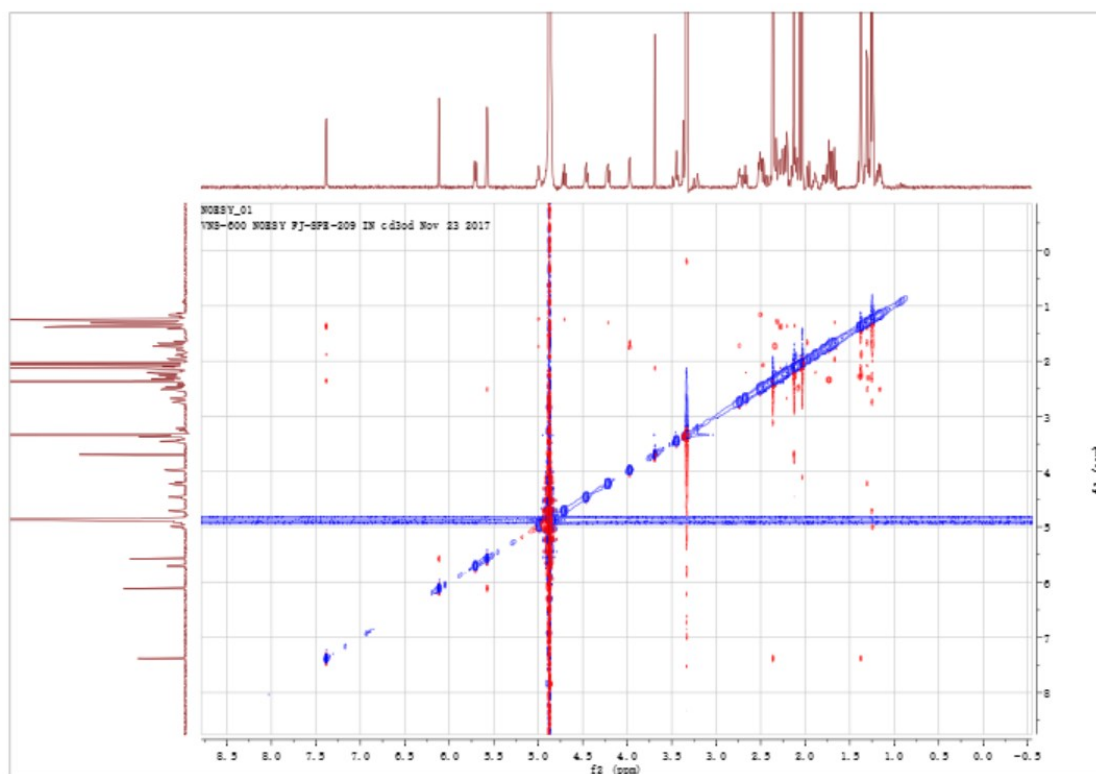

**Figure S46.** NOESY spectrum of Xanthanoltrimer C (**3**) (600 MHz, in CD<sub>3</sub>OD)

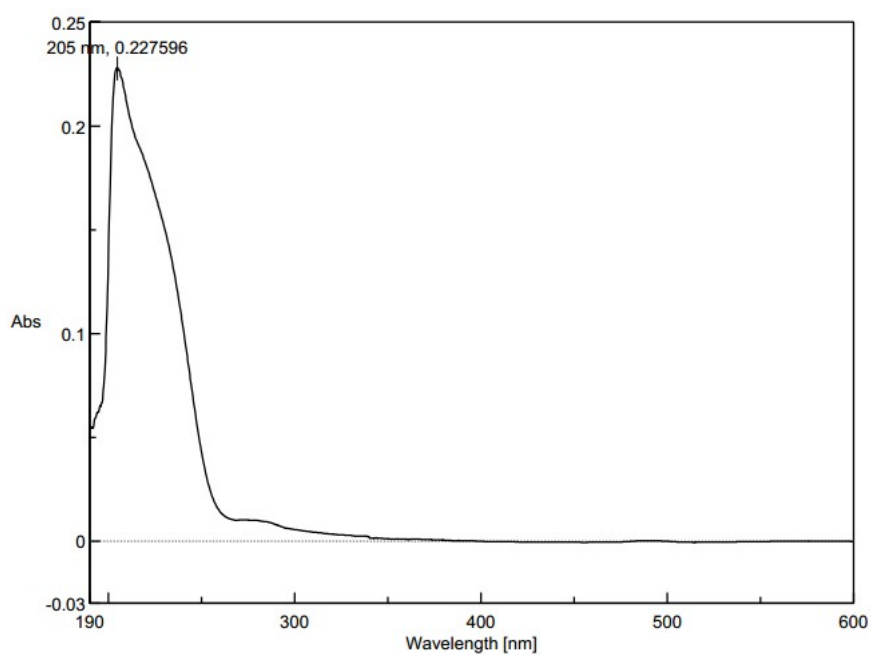

**Figure S47.** Experimental UV spectrum of Xanthanoltrimer C (**3**) in MeOH

### NMR chemical shifts and ECD calculation of Xanthanoltrimer A (1).

Conformational analysis of the **1A** and **1B** (Fig. S48) were carried out via Monte Carlo searching with the MMFF94s molecular mechanics force field using the spartan 14 software. 3 of **1A** and 2 of **1B** geometries having relative energies within 5 kcal/mol were optimized using DFT at the B3LYP/6-31+G (d, p) level in vacuum with the Gaussian 09 program, respectively. NMR chemical shifts calculation for those B3LYP/6-31+G (d, p)-optimized conformers with their Boltzmann distribution ( $\cong 1\%$ , Table S2, S4) were carried out at PCM/mPW1PW91/6-311+G (d, p) level in methanol with GIAO method. After Boltzmann weighing of the calculated chemical shift of each isomers, the DP4+ parameters were calculated using the excel file (Table. S5), which was provided by Ariel M. Sarotti.

In addition, those stable conformers with their Boltzmann distribution ( $\cong 1\%$ ) also were carried out at the TDDFT CAM-B3LYP/6-311+G(2d,p) level in the methanol for ECD computation. Boltzmann statistics were performed for ECD simulations with a standard deviation of  $\sigma$  0.3 eV. The final ECD spectra of **1A** and **1B** were obtained according to the Boltzmann distribution theory and their relative Gibbs free energy ( $\Delta G$ ), respectively.

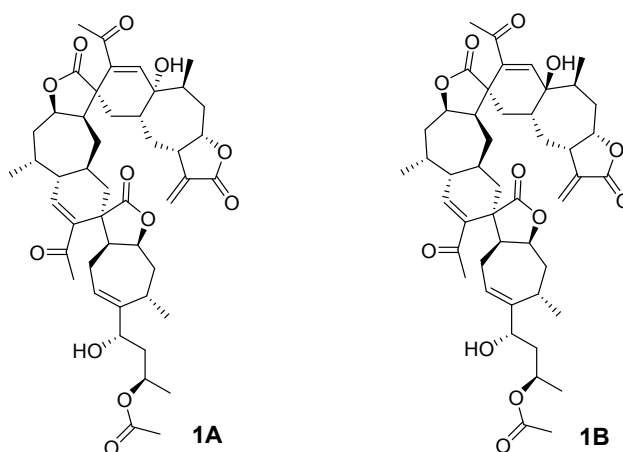

**Figure S48.** The Structures of **1A** and **1B**

**Table S1.** Free energies ( $\Delta G$ ), and Boltzmann distribution abundances of conformers of **1A**.

| Conf.        | B3LYP/6-31+G(d, p) Gibbs free energy (298.15 K) |                       |                        |
|--------------|-------------------------------------------------|-----------------------|------------------------|
|              | G (Hartree)                                     | $\Delta G$ (Kcal/mol) | Boltzmann Distribution |
| <b>1A-C1</b> | -2729.074051                                    | 1.2410                | 0.109                  |
| <b>1A-C2</b> | -2729.076028                                    | 0.0000                | 0.884                  |
| <b>1A-C3</b> | -2729.071505                                    | 2.8380                | 0.007                  |

**Table S2.** Experimental  $^{13}\text{C}$ -NMR chemical shifts and GIAO isotropic magnetic shielding values calculated for PCM/mPW1PW91/6-311+G (d, p) geometries of **1A**

| No.  | Exptl. | 1A-C1    | 1A-C2    | 1A-C3    | Averaged <sup>a</sup> | Unscaled shifts ( $\delta_{\text{U}}$ ) <sup>b</sup> | Scaled shifts ( $\delta_{\text{S}}$ ) <sup>c</sup> |
|------|--------|----------|----------|----------|-----------------------|------------------------------------------------------|----------------------------------------------------|
| 4    | 199.8  | -24.2677 | -22.773  | -22.8147 | -22.9362              | 211                                                  | 200.4                                              |
| 4'   | 199.4  | -19.8732 | -19.88   | -19.6676 | -19.8778              | 207.9                                                | 197.5                                              |
| 12'  | 182.9  | -2.1674  | -1.7316  | -1.9395  | -1.7806               | 189.8                                                | 180.2                                              |
| 12'' | 182.9  | -1.8479  | -1.829   | -1.9019  | -1.8316               | 189.9                                                | 180.3                                              |
| 16'' | 172.8  | 7.2434   | 3.7175   | 5.3591   | 4.1133                | 183.9                                                | 174.5                                              |
| 12   | 172.9  | 8.8939   | 9.2225   | 8.1473   | 9.179                 | 178.9                                                | 169.8                                              |
| 2'   | 152.4  | 20.2918  | 20.575   | 21.1474  | 20.5481               | 167.5                                                | 158.9                                              |
| 2    | 155.3  | 25.9869  | 24.6578  | 24.1562  | 24.7992               | 163.2                                                | 154.8                                              |
| 1''  | 151.1  | 27.5825  | 32.1139  | 26.1563  | 31.5783               | 156.5                                                | 148.4                                              |
| 11   | 142.2  | 38.4248  | 38.7495  | 37.8163  | 38.7076               | 149.3                                                | 141.5                                              |
| 3    | 138.1  | 41.2892  | 41.6497  | 41.0494  | 41.6062               | 146.4                                                | 138.7                                              |
| 3'   | 137    | 42.1104  | 41.1067  | 42.9115  | 41.2287               | 146.8                                                | 139.1                                              |
| 5''  | 125.1  | 47.0173  | 46.6989  | 52.6286  | 46.7751               | 141.3                                                | 133.9                                              |
| 13   | 119.5  | 56.7783  | 54.1096  | 58.5223  | 54.4314               | 133.6                                                | 126.5                                              |
| 8'   | 80.7   | 104.5752 | 105.8987 | 105.1879 | 105.7495              | 82.3                                                 | 77.5                                               |
| 8    | 85     | 105.4358 | 105.7089 | 105.6745 | 105.6789              | 82.4                                                 | 77.6                                               |
| 8''  | 82.9   | 107.7236 | 106.5067 | 107.6005 | 106.6470              | 81.4                                                 | 76.6                                               |
| 1    | 75.7   | 110.1608 | 110.8988 | 110.2205 | 110.8136              | 77.2                                                 | 72.6                                               |
| 2''  | 76.1   | 113.3342 | 108.4663 | 111.9112 | 109.0210              | 79                                                   | 74.3                                               |
| 4''  | 70     | 115.4472 | 113.0899 | 106.8831 | 113.3034              | 74.7                                                 | 70.2                                               |
| 7''  | 51.7   | 129.9109 | 129.8832 | 130.7033 | 129.8920              | 56.4                                                 | 52.8                                               |
| 11'' | 50.3   | 130.8012 | 131.784  | 131.5733 | 131.6754              | 58.2                                                 | 54.5                                               |
| 7    | 45     | 131.3955 | 130.2133 | 130.5957 | 130.3448              | 57.7                                                 | 54                                                 |
| 1'   | 47.7   | 132.2261 | 132.0372 | 130.8537 | 132.0495              | 56                                                   | 52.4                                               |
| 7'   | 53.6   | 134.1143 | 131.9252 | 132.7065 | 132.1693              | 55.9                                                 | 52.3                                               |
| 3''  | 43.1   | 141.0022 | 143.8861 | 142.0056 | 143.5586              | 44.5                                                 | 41.4                                               |
| 7    | 45     | 141.341  | 140.2309 | 141.6118 | 140.3616              | 47.7                                                 | 44.4                                               |
| 10   | 40.3   | 142.5357 | 143.8457 | 144.6051 | 143.7082              | 45                                                   | 41.9                                               |
| 13'  | 33.8   | 142.854  | 143.079  | 143.3633 | 143.0565              | 44.3                                                 | 41.2                                               |
| 13'' | 35.7   | 143.3568 | 143.0022 | 143.4267 | 143.0438              | 45                                                   | 41.9                                               |
| 10'' | 30.7   | 144.8651 | 149.8488 | 145.1026 | 149.2724              | 38.8                                                 | 35.9                                               |

|     |      |          |          |          |          |      |      |
|-----|------|----------|----------|----------|----------|------|------|
| 10' | 35.6 | 148.3974 | 147.76   | 148.0268 | 147.8313 | 40.2 | 37.3 |
| 9'  | 40.2 | 149.3384 | 150.8572 | 149.3516 | 150.6811 | 37.4 | 34.6 |
| 6'  | 36.6 | 150.1421 | 151.3641 | 150.955  | 151.2280 | 36.8 | 34   |
| 5   | 40.2 | 151.5593 | 151.6731 | 152.0533 | 151.6634 | 38.6 | 35.8 |
| 9"  | 38.2 | 151.6116 | 149.1854 | 151.2756 | 149.4645 | 36.4 | 33.6 |
| 5'  | 35.1 | 153.1788 | 154.6064 | 152.8255 | 154.4383 | 37.9 | 35.1 |
| 9   | 33.6 | 153.2698 | 149.6976 | 151.3235 | 150.0984 | 33.6 | 31   |
| 6   | 32.8 | 154.954  | 150.1934 | 153.3478 | 150.7344 | 37.3 | 34.5 |
| 15  | 26.4 | 158.3344 | 158.8158 | 158.6012 | 158.7618 | 29.3 | 26.9 |
| 6"  | 25.9 | 158.5352 | 160.2168 | 159.3212 | 160.0272 | 28   | 25.6 |
| 15' | 26.1 | 158.8347 | 158.7384 | 158.9428 | 158.7503 | 29.3 | 26.9 |
| 17" | 21.4 | 164.0893 | 164.0688 | 164.3076 | 164.0727 | 24   | 21.8 |
| 15" | 20.9 | 166.8515 | 166.0492 | 167.6106 | 166.1476 | 21.9 | 19.8 |
| 14" | 19.9 | 168.1743 | 166.4981 | 167.7568 | 166.6896 | 21.4 | 19.3 |
| 14  | 15.9 | 171.6931 | 172.0643 | 172.1729 | 172.0246 | 16   | 14.2 |
| 14' | 21.5 | 172.6394 | 173.3598 | 173.2471 | 173.2805 | 14.8 | 13   |

<sup>a</sup>Averaged according to the Boltzmann-calculated contribution at B3LYP/6-31+G(d,p) level. <sup>b</sup> $\delta_U$  = Calculated Shielding Value (TMS) – Calculated Shielding value (Averaged).  $\delta_S = (\delta_U - 1.1724) / 1.0469$

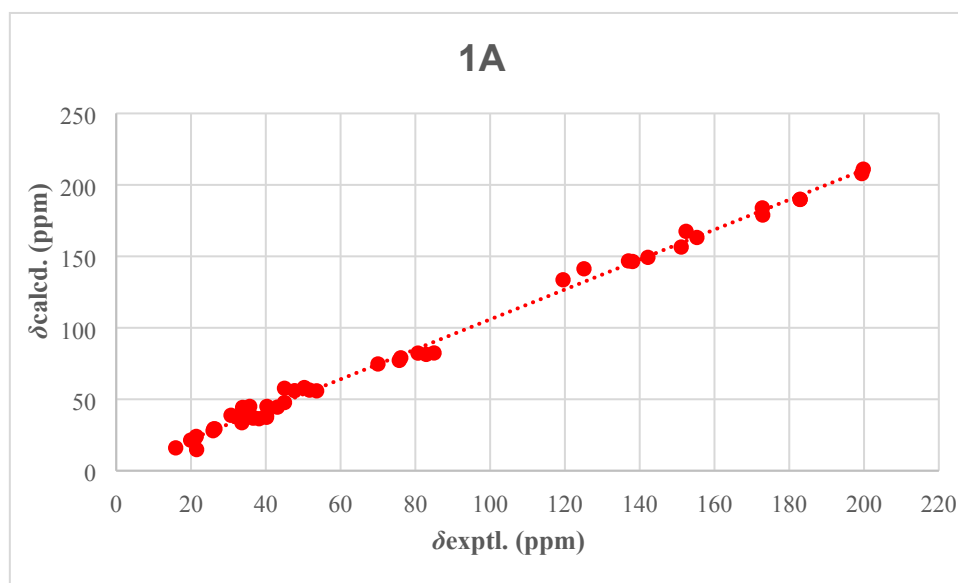

**Figure S49.** Correlation plots of experimental <sup>13</sup>C-NMR chemical shifts versus corresponding calculated <sup>13</sup>C-NMR chemical shifts for **1A**.

**Table S3.** Experimental <sup>1</sup>H-NMR chemical shifts and GIAO isotropic magnetic shielding values calculated for PCM/mPW1PW91/6-311+G (d, p) geometries of **1A**

| No. | Exptl. | 1A-C1   | 1A-C2   | 1AC3    | Averaged <sup>a</sup> |
|-----|--------|---------|---------|---------|-----------------------|
| 2   | 6.91   | 24.305  | 24.4577 | 24.4542 | 24.44103              |
| 5   | 2.33   | 29.8498 | 29.9036 | 29.9367 | 29.89797              |
| 6a  | 2.5    | 29.5004 | 29.4104 | 29.4049 | 29.42017              |
| 6b  | 1.33   | 30.2577 | 30.6646 | 30.3358 | 30.61795              |

|      |      |          |          |          |          |
|------|------|----------|----------|----------|----------|
| 7    | 3.4  | 27.9387  | 28.5437  | 28.0845  | 28.47454 |
| 8    | 4.25 | 26.8685  | 26.8991  | 26.7558  | 26.89476 |
| 9a   | 2.5  | 29.2172  | 29.0354  | 29.1778  | 29.05621 |
| 9b   | 2.13 | 29.9984  | 29.6432  | 30.0049  | 29.68445 |
| 10   | 2.33 | 29.4389  | 29.4406  | 29.579   | 29.44138 |
| 13a  | 6.15 | 25.2582  | 25.0086  | 25.2481  | 25.03748 |
| 13b  | 5.63 | 25.9652  | 25.6107  | 25.8648  | 25.65112 |
| 14   | 1.18 | 30.83897 | 30.96503 | 30.8491  | 30.95048 |
| 15   | 2.42 | 29.2891  | 29.39903 | 29.37873 | 29.38691 |
| 1'   | 2.13 | 29.3344  | 29.2479  | 29.3801  | 29.25825 |
| 2'   | 7.38 | 24.1027  | 24.2941  | 24.3824  | 24.27386 |
| 5'   | 1.69 | 30.4588  | 30.4381  | 30.4581  | 30.4405  |
| 6'a  | 2.03 | 29.8416  | 29.6717  | 29.7802  | 29.69098 |
| 6'b  | 1.35 | 30.958   | 30.9617  | 31.0787  | 30.96212 |
| 7'   | 2.71 | 29.0029  | 29.1931  | 29.2627  | 29.17286 |
| 8'   | 4.54 | 26.5914  | 26.6771  | 26.7188  | 26.66805 |
| 9'a  | 2.22 | 28.9943  | 29.3427  | 29.3111  | 29.3045  |
| 9'b  | 2.22 | 29.5234  | 29.3326  | 29.3649  | 29.35362 |
| 10'  | 1.88 | 29.2807  | 29.1601  | 29.2529  | 29.1739  |
| 13'a | 2.19 | 30.0172  | 30.1185  | 30.0962  | 30.1073  |
| 13'b | 1.62 | 30.0958  | 30.1412  | 30.3043  | 30.13739 |
| 14'  | 1.41 | 30.9022  | 30.95183 | 30.95337 | 30.94643 |
| 15'  | 2.38 | 29.3842  | 29.4759  | 29.42033 | 29.46552 |
| 2"   | 3.98 | 27.8946  | 28.3093  | 27.6726  | 28.25964 |
| 3"a  | 1.73 | 29.8553  | 30.0055  | 30.5773  | 29.99313 |
| 3"b  | 1.69 | 30.0648  | 30.4013  | 29.0408  | 30.3551  |
| 4"   | 5.01 | 27.121   | 26.8155  | 27.3277  | 26.85238 |
| 5"   | 5.7  | 25.3011  | 25.7065  | 25.4109  | 25.66024 |
| 6"a  | 2.22 | 28.7024  | 29.0619  | 29.228   | 29.02388 |
| 6"b  | 2.1  | 30.2811  | 30.4374  | 30.3562  | 30.41979 |
| 7"   | 2.34 | 29.248   | 29.2891  | 29.3067  | 29.28474 |
| 8"   | 4.7  | 26.8799  | 26.8801  | 26.9088  | 26.88028 |
| 9"a  | 2.34 | 28.9143  | 29.0499  | 29.1508  | 29.03583 |
| 9"b  | 1.73 | 29.4808  | 29.6461  | 29.5874  | 29.62767 |
| 10"  | 2.74 | 29.1613  | 29.2073  | 29.0227  | 29.20099 |
| 13"a | 2.27 | 30.112   | 30.1172  | 30.0659  | 30.11627 |
| 13"b | 1.42 | 30.4243  | 30.4585  | 30.4784  | 30.45491 |
| 14"  | 1.24 | 30.74543 | 30.6216  | 30.9147  | 30.63715 |
| 15"  | 1.25 | 30.84587 | 30.5342  | 30.48803 | 30.56785 |
| 17"  | 2.04 | 29.78927 | 29.65277 | 29.84767 | 29.66901 |

**Table S4.** Free energies ( $\Delta G$ ), and Boltzmann distribution abundances of conformers of **1B**.

| Conf.        | B3LYP/6-31+G(d, p) Gibbs free energy (298.15 K) |                       |                        |
|--------------|-------------------------------------------------|-----------------------|------------------------|
|              | G (Hartree)                                     | $\Delta G$ (Kcal/mol) | Boltzmann Distribution |
| <b>1B-C1</b> | -2729.066919                                    | 0.0000                | 0.781                  |
| <b>1B-C2</b> | -2729.065721                                    | 0.7520                | 0.219                  |

**Table S5.** Experimental  $^{13}\text{C}$ -NMR chemical shifts and GIAO isotropic magnetic shielding values calculated for PCM/mPW1PW91/6-311+G (d, p) geometries of **1B**

| No.  | Exptl. | 1B-C1    | 1B-C2    | Averaged <sup>a</sup> | Unscaled shifts ( $\delta_{\text{U}}$ ) <sup>b</sup> | Scaled shifts ( $\delta_{\text{S}}$ ) <sup>c</sup> |
|------|--------|----------|----------|-----------------------|------------------------------------------------------|----------------------------------------------------|
| 4    | 199.8  | -24.8753 | -24.6777 | -24.8320              | 212.9                                                | 202.1                                              |
| 4'   | 199.4  | -20.2708 | -20.0028 | -20.2121              | 208.3                                                | 197.7                                              |
| 12'  | 182.9  | -1.5909  | -1.6106  | -1.5952               | 189.6                                                | 179.8                                              |
| 12'' | 182.9  | -2.2873  | -2.5158  | -2.3373               | 190.4                                                | 180.6                                              |
| 16'' | 172.8  | 6.674    | 6.171    | 6.5638                | 181.5                                                | 172.1                                              |
| 12   | 172.9  | 9.2066   | 9.2054   | 9.2063                | 178.8                                                | 169.5                                              |
| 2'   | 152.4  | 20.503   | 20.4711  | 20.4960               | 167.6                                                | 158.8                                              |
| 2    | 155.3  | 23.705   | 23.5886  | 23.6795               | 164.4                                                | 155.7                                              |
| 1''  | 151.1  | 26.9961  | 31.1864  | 27.9138               | 160.1                                                | 151.6                                              |
| 11   | 142.2  | 37.5159  | 37.8527  | 37.5897               | 150.5                                                | 142.4                                              |
| 3    | 138.1  | 40.6094  | 40.7337  | 40.6367               | 147.4                                                | 139.5                                              |
| 3'   | 137    | 42.1643  | 41.9158  | 42.1099               | 145.9                                                | 138                                                |
| 5''  | 125.1  | 46.4679  | 49.1159  | 47.0478               | 141                                                  | 133.4                                              |
| 13   | 119.5  | 54.5141  | 54.6721  | 54.5487               | 133.5                                                | 126.2                                              |
| 8'   | 80.7   | 105.5879 | 105.2782 | 105.5201              | 82.5                                                 | 77.4                                               |
| 8    | 85     | 107.1732 | 106.762  | 107.0831              | 81                                                   | 76                                                 |
| 8''  | 82.9   | 107.9584 | 107.907  | 107.9471              | 80.1                                                 | 75.1                                               |
| 1    | 75.7   | 107.6414 | 107.4685 | 107.6035              | 80.4                                                 | 75.4                                               |
| 2''  | 76.1   | 113.1089 | 113.4848 | 113.1912              | 74.9                                                 | 70.2                                               |
| 4''  | 70     | 115.4572 | 114.8813 | 115.3311              | 72.7                                                 | 68.1                                               |
| 7''  | 51.7   | 129.9327 | 129.8751 | 129.9201              | 56                                                   | 52.1                                               |
| 11'' | 50.3   | 132.049  | 132.2494 | 132.0929              | 58.1                                                 | 54.1                                               |
| 7    | 45     | 131.6246 | 131.3151 | 131.5569              | 56.5                                                 | 52.6                                               |
| 1'   | 47.7   | 132.1092 | 132.0732 | 132.1013              | 55.9                                                 | 52                                                 |
| 7'   | 53.6   | 133.4664 | 132.9841 | 133.3608              | 54.7                                                 | 50.9                                               |
| 3''  | 43.1   | 141.1913 | 140.4954 | 141.0389              | 47                                                   | 43.5                                               |
| 7    | 45     | 144.2361 | 144.4108 | 144.2744              | 43.8                                                 | 40.4                                               |
| 10   | 40.3   | 141.4942 | 141.8267 | 141.5670              | 40                                                   | 36.8                                               |
| 13'  | 33.8   | 142.8835 | 142.3149 | 142.7590              | 46.5                                                 | 43                                                 |
| 13'' | 35.7   | 147.9469 | 148.274  | 148.0185              | 45.3                                                 | 41.9                                               |
| 10'' | 30.7   | 145.4311 | 145.6631 | 145.4819              | 42.6                                                 | 39.3                                               |
| 10'  | 35.6   | 148.2532 | 148.3585 | 148.2763              | 39.8                                                 | 36.6                                               |

|     |      |          |          |          |      |      |
|-----|------|----------|----------|----------|------|------|
| 9'  | 40.2 | 149.8029 | 149.1306 | 149.6557 | 38.4 | 35.3 |
| 6'  | 36.6 | 148.9969 | 149.4287 | 149.0915 | 39   | 35.9 |
| 5   | 40.2 | 150.4739 | 150.8581 | 150.5580 | 45.2 | 41.8 |
| 9"  | 38.2 | 142.8203 | 142.8835 | 142.8341 | 37.5 | 34.4 |
| 5'  | 35.1 | 149.7776 | 149.714  | 149.7637 | 34.2 | 31.3 |
| 9   | 33.6 | 154.0048 | 153.4025 | 153.8729 | 38.3 | 35.2 |
| 6   | 32.8 | 150.507  | 150.3134 | 150.4646 | 37.6 | 34.5 |
| 15  | 26.4 | 158.3848 | 158.4189 | 158.3923 | 29.7 | 27   |
| 6"  | 25.9 | 158.7659 | 158.7152 | 158.7548 | 29.3 | 26.6 |
| 15' | 26.1 | 158.5936 | 158.7546 | 158.6289 | 29.4 | 26.7 |
| 17" | 21.4 | 164.1396 | 164.2383 | 164.1612 | 23.9 | 21.4 |
| 15" | 20.9 | 166.9745 | 166.7797 | 166.9318 | 21.1 | 18.7 |
| 14" | 19.9 | 167.5435 | 168.0417 | 167.6526 | 20.4 | 18.1 |
| 14  | 15.9 | 169.3172 | 169.1502 | 169.2806 | 18.8 | 16.5 |
| 14' | 21.5 | 172.9887 | 172.9559 | 172.9815 | 15.1 | 13   |

<sup>a</sup>Averaged according to the Boltzmann-calculated contribution at B3LYP/6-31+G(d,p) level. <sup>b</sup> $\delta_U$  = Calculated Shielding Value (TMS) – Calculated Shielding value (Averaged).  $\delta_S = (\delta_U - 1.4871)/1.0462$

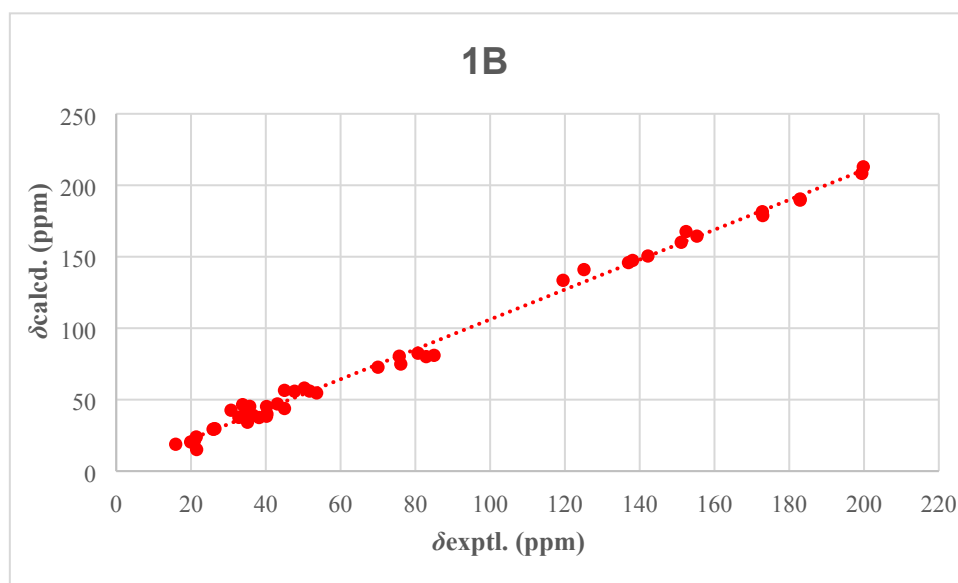

**Figure S50.** Correlation plots of experimental <sup>13</sup>C-NMR chemical shifts versus corresponding calculated <sup>13</sup>C-NMR chemical shifts for **1B**.

Table S6. Experimental <sup>1</sup>H-NMR chemical shifts and GIAO isotropic magnetic shielding values calculated for PCM/mPW1PW91/6-311+G (d, p) geometries of **1B**

| No. | Exptl. | 1B-C1   | 1B-C2   | Averaged <sup>a</sup> |
|-----|--------|---------|---------|-----------------------|
| 2   | 6.91   | 24.4611 | 24.4481 | 24.45825              |
| 5   | 2.33   | 29.9034 | 29.8498 | 29.89166              |
| 6a  | 2.5    | 30.1538 | 30.0925 | 30.14038              |
| 6b  | 1.33   | 29.5725 | 29.6096 | 29.58062              |
| 7   | 3.4    | 28.2441 | 28.2708 | 28.24995              |



|      |      |          |          |          |
|------|------|----------|----------|----------|
| 8    | 4.25 | 25.9539  | 25.9308  | 25.94884 |
| 9a   | 2.5  | 30.0441  | 30.0176  | 30.03830 |
| 9b   | 2.13 | 29.1995  | 29.203   | 29.20027 |
| 10   | 2.33 | 29.7231  | 29.6974  | 29.71747 |
| 13a  | 6.15 | 25.2441  | 25.2016  | 25.23479 |
| 13b  | 5.63 | 25.7662  | 25.6727  | 25.74572 |
| 14   | 1.18 | 30.53143 | 30.5054  | 30.52573 |
| 15   | 2.42 | 29.29777 | 29.3161  | 29.30178 |
| 1'   | 2.13 | 29.4868  | 29.4361  | 29.47570 |
| 2'   | 7.38 | 24.1731  | 24.1494  | 24.16791 |
| 5'   | 1.69 | 30.4986  | 30.4488  | 30.48769 |
| 6'a  | 2.03 | 30.3097  | 30.0383  | 30.25026 |
| 6'b  | 1.35 | 30.8287  | 30.8206  | 30.82693 |
| 7'   | 2.71 | 29.2818  | 29.2062  | 29.26524 |
| 8'   | 4.54 | 26.7607  | 26.719   | 26.75157 |
| 9'a  | 2.22 | 29.0647  | 29.1633  | 29.08629 |
| 9'b  | 2.22 | 29.696   | 29.603   | 29.67563 |
| 10'  | 1.88 | 29.2871  | 29.3348  | 29.29755 |
| 13'a | 2.19 | 30.0562  | 30.0339  | 30.05132 |
| 13'b | 1.62 | 30.1276  | 30.1132  | 30.12445 |
| 14'  | 1.41 | 30.95757 | 30.9455  | 30.95492 |
| 15'  | 2.38 | 29.46273 | 29.44383 | 29.45859 |
| 2"   | 3.98 | 27.9628  | 27.8615  | 27.94062 |
| 3"a  | 1.73 | 29.8095  | 30.1317  | 29.88006 |
| 3"b  | 1.69 | 30.0689  | 29.7034  | 29.98886 |
| 4"   | 5.01 | 27.103   | 27.1869  | 27.12137 |
| 5"   | 5.7  | 25.4568  | 25.7227  | 25.51503 |
| 6"a  | 2.22 | 28.795   | 28.8402  | 28.80490 |
| 6"b  | 2.1  | 30.3232  | 30.3473  | 30.32848 |
| 7"   | 2.34 | 29.3955  | 29.3156  | 29.37800 |
| 8"   | 4.7  | 26.8254  | 26.7057  | 26.79919 |
| 9"a  | 2.34 | 29.5938  | 29.5789  | 29.59054 |
| 9"b  | 1.73 | 29.0655  | 29.133   | 29.08028 |
| 10"  | 2.74 | 29.2667  | 29.2053  | 29.25325 |
| 13"a | 2.27 | 30.2558  | 30.1652  | 30.23596 |
| 13"b | 1.42 | 30.4322  | 30.3519  | 30.41461 |
| 14"  | 1.24 | 30.756   | 30.70833 | 30.74556 |
| 15"  | 1.25 | 30.61137 | 30.61537 | 30.61224 |
| 17"  | 2.04 | 29.80897 | 29.74703 | 29.79540 |

**Table S7.** Experimental chemical shifts, the calculated shielding tensors for **1A** (isomer 1) and **1B** (isomer 2), and the DP4+ probability of **1A** and **1B**

| Functional |      | Solvent?    |             | Basis Set    |          | Type of Data      |          |
|------------|------|-------------|-------------|--------------|----------|-------------------|----------|
| mPW1Pw91   |      | PCM         |             | 6-311+G(d,p) |          | Shielding Tensors |          |
|            |      | DP4+        | 100.00%     | 0.00%        | -        | -                 | -        |
| Nuclei     | sp2? | Experimenta | Isomer 1    | Isomer 2     | Isomer 3 | Isomer 4          | Isomer 5 |
| C          | x    | 199.8       | -22.9       | -24.8        |          |                   |          |
| C          | x    | 199.4       | -19.9       | -20.2        |          |                   |          |
| C          | x    | 182.9       | -1.8        | -1.6         |          |                   |          |
| C          | x    | 182.9       | -1.8        | -2.3         |          |                   |          |
| C          | x    | 172.8       | 4.1         | 6.6          |          |                   |          |
| C          | x    | 172.9       | 9.2         | 9.2          |          |                   |          |
| C          | x    | 152.4       | 20.5        | 20.5         |          |                   |          |
| C          | x    | 155.3       | 24.8        | 23.7         |          |                   |          |
| C          | x    | 151.1       | 31.6        | 27.9         |          |                   |          |
| C          | x    | 142.2       | 38.7        | 37.6         |          |                   |          |
| C          | x    | 138.1       | 41.6        | 40.6         |          |                   |          |
| C          | x    | 137         | 41.23       | 42.11        |          |                   |          |
| C          | x    | 125.1       | 46.78       | 47.05        |          |                   |          |
| C          | x    | 119.5       | 54.43       | 54.55        |          |                   |          |
| C          |      | 80.7        | 105.75      | 105.52       |          |                   |          |
| C          |      | 85          | 105.68      | 107.08       |          |                   |          |
| C          |      | 82.9        | 106.65      | 107.95       |          |                   |          |
| C          |      | 75.7        | 110.81      | 107.60       |          |                   |          |
| C          |      | 76.1        | 109.02      | 113.19       |          |                   |          |
| C          |      | 70          | 113.30      | 115.33       |          |                   |          |
| C          |      | 51.7        | 131.68      | 132.09       |          |                   |          |
| C          |      | 50.3        | 129.89      | 129.92       |          |                   |          |
| C          |      | 45          | 130.34      | 131.56       |          |                   |          |
| C          |      | 47.7        | 132.05      | 132.10       |          |                   |          |
| C          |      | 53.6        | 132.17      | 133.36       |          |                   |          |
| C          |      | 43.1        | 143.5585914 | 141.0388979  |          |                   |          |
| C          |      | 45          | 140.3615672 | 144.2743593  |          |                   |          |
| C          |      | 40.3        | 143.0438229 | 148.0185349  |          |                   |          |
| C          |      | 33.8        | 143.7082258 | 141.5670175  |          |                   |          |
| C          |      | 35.7        | 143.0564651 | 142.7589766  |          |                   |          |
| C          |      | 30.7        | 149.2723533 | 145.481908   |          |                   |          |
| C          |      | 35.6        | 147.8313442 | 148.2762807  |          |                   |          |
| C          |      | 40.2        | 150.6811116 | 149.6556663  |          |                   |          |
| C          |      | 36.6        | 151.2280383 | 149.0914642  |          |                   |          |
| C          |      | 40.2        | 149.4644872 | 142.8341408  |          |                   |          |
| C          |      | 38.2        | 151.6633572 | 150.5580398  |          |                   |          |
| C          |      | 35.1        | 150.0983511 | 153.8728963  |          |                   |          |
| C          |      | 33.6        | 154.4282253 | 149.7636716  |          |                   |          |
| C          |      | 32.8        | 150.7343862 | 150.4648016  |          |                   |          |
| C          |      | 26.4        | 158.7618252 | 158.3922679  |          |                   |          |
| C          |      | 25.9        | 160.0272364 | 158.7547967  |          |                   |          |
| C          |      | 26.1        | 158.7503275 | 158.628859   |          |                   |          |
| C          |      | 21.4        | 164.0727061 | 164.1612153  |          |                   |          |
| C          |      | 20.9        | 166.1475805 | 166.9318388  |          |                   |          |
| C          |      | 19.9        | 166.6896167 | 167.6526058  |          |                   |          |
| C          |      | 15.9        | 172.0245994 | 169.280627   |          |                   |          |
| C          |      | 21.5        | 173.2804875 | 172.9815168  |          |                   |          |
| H          | x    | 6.91        | 24.4410312  | 24.458253    |          |                   |          |
| H          |      | 2.33        | 29.8979675  | 29.8916616   |          |                   |          |
| H          |      | 2.5         | 29.4201715  | 30.1403753   |          |                   |          |
| H          |      | 1.33        | 30.6179463  | 29.5806249   |          |                   |          |
| H          |      | 3.4         | 28.4745406  | 28.2499473   |          |                   |          |
| H          |      | 4.25        | 26.8947615  | 25.9488411   |          |                   |          |
| H          |      | 2.5         | 29.056213   | 30.0382965   |          |                   |          |
| H          |      | 2.13        | 29.6844487  | 29.2002665   |          |                   |          |
| H          |      | 2.33        | 29.4413835  | 29.7174717   |          |                   |          |
| H          | x    | 6.15        | 25.0374829  | 25.2347925   |          |                   |          |
| H          | x    | 5.63        | 25.6511192  | 25.7457235   |          |                   |          |
| H          |      | 1.18        | 30.95048053 | 30.52573203  |          |                   |          |
| H          |      | 2.42        | 29.3889085  | 29.30178167  |          |                   |          |
| H          |      | 2.13        | 29.2582539  | 29.4756967   |          |                   |          |
| H          | x    | 7.38        | 24.2738555  | 24.1679097   |          |                   |          |
| H          |      | 1.69        | 30.4404963  | 30.4876938   |          |                   |          |
| H          |      | 2.03        | 29.8909786  | 30.2502634   |          |                   |          |
| H          |      | 1.35        | 30.9621157  | 30.8269261   |          |                   |          |
| H          |      | 2.71        | 29.1728554  | 29.2652436   |          |                   |          |
| H          |      | 4.54        | 26.6680506  | 26.7515677   |          |                   |          |
| H          |      | 2.22        | 29.3045032  | 29.0862934   |          |                   |          |
| H          |      | 2.22        | 29.3536233  | 29.675633    |          |                   |          |
| H          |      | 1.88        | 29.173895   | 29.2975463   |          |                   |          |
| H          |      | 2.19        | 30.1073022  | 30.0512163   |          |                   |          |
| H          |      | 1.62        | 30.1373931  | 30.1244464   |          |                   |          |
| H          |      | 1.41        | 30.94643403 | 30.95492407  |          |                   |          |
| H          |      | 2.38        | 29.46551573 | 29.45859423  |          |                   |          |
| H          |      | 3.98        | 28.2596408  | 27.9406153   |          |                   |          |
| H          |      | 1.73        | 29.9931308  | 29.8800618   |          |                   |          |
| H          |      | 1.69        | 30.355098   | 29.9888555   |          |                   |          |
| H          |      | 5.01        | 26.8523849  | 27.1213741   |          |                   |          |
| H          | x    | 5.7         | 25.6602422  | 25.5150321   |          |                   |          |
| H          |      | 2.22        | 29.0238772  | 28.8048988   |          |                   |          |
| H          |      | 2.1         | 30.4197949  | 30.3284779   |          |                   |          |
| H          |      | 2.34        | 29.2847433  | 29.3780019   |          |                   |          |
| H          |      | 4.7         | 26.8802791  | 26.7991857   |          |                   |          |
| H          |      | 2.34        | 29.0358259  | 29.5905369   |          |                   |          |
| H          |      | 1.73        | 29.6276714  | 29.0802825   |          |                   |          |
| H          |      | 2.74        | 29.2009938  | 29.2532534   |          |                   |          |
| H          |      | 2.27        | 30.1162741  | 30.2359586   |          |                   |          |
| H          |      | 1.42        | 30.4549115  | 30.4146143   |          |                   |          |
| H          |      | 1.24        | 30.63714953 | 30.745561    |          |                   |          |
| H          |      | 1.25        | 30.5678485  | 30.61224267  |          |                   |          |
| H          |      | 2.04        | 29.66900947 | 29.79540327  |          |                   |          |

### NMR chemical shifts and ECD calculation of Xanthanoltrimer C (3).

Conformational analysis of the **3A** and **3B** (Fig. S52) were carried out via Monte Carlo searching with the MMFF94s molecular mechanics force field using the spartan 14 software. 4 of **3A** and 3 of **3B** geometries having relative energies within 5 kcal/mol were optimized using DFT at the B3LYP/6-31+G (d, p) level in vacuum with the Gaussian 09 program, respectively. NMR chemical shifts calculation for those B3LYP/6-31+G (d, p)-optimized conformers with their Boltzmann distribution ( $\cong 1\%$ , Table S7, S9) were carried out at PCM/mPW1PW91/6-311+G (d, p) level in methanol with GIAO method. After Boltzmann weighing of the calculated chemical shift of each isomers, the DP4+ parameters were calculated using the excel file (Table S10), which was provided by Ariel M. Sarotti.

In addition, those stable conformers with their Boltzmann distribution ( $\cong 1\%$ ) also were carried out at the TDDFT CAM-B3LYP/6-311+G (2d,p) level in the methanol for ECD computation. Boltzmann statistics were performed for ECD simulations with a standard deviation of  $\sigma$  0.3 eV. The final ECD spectra of **3A** and **3B** were obtained according to the Boltzmann distribution theory and their relative Gibbs free energy ( $\Delta G$ ), respectively.

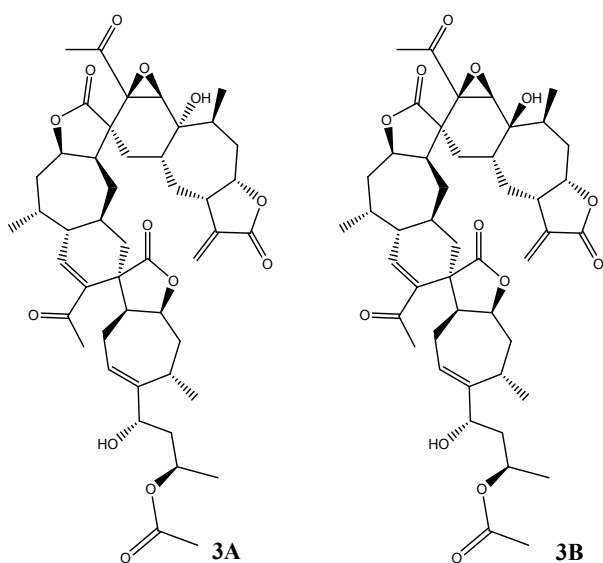

**Figure S51.** The Structures of **3A** and **3B**

**Table S8.** Free energies ( $\Delta G$ ), and Boltzmann distribution abundances of conformers of **3A**.

| Conf.        | B3LYP/6-31+G(d, p) Gibbs free energy (298.15 K) |                       |                        |
|--------------|-------------------------------------------------|-----------------------|------------------------|
|              | G (Hartree)                                     | $\Delta G$ (Kcal/mol) | Boltzmann Distribution |
| <b>3A-C1</b> | -2804.262217                                    | 0.0000                | 0.897                  |
| <b>3A-C2</b> | -2804.260176                                    | 1.2810                | 0.103                  |

**Table S9.** Experimental  $^{13}\text{C}$ -NMR chemical shifts and GIAO isotropic magnetic shielding values calculated for PCM/mPW1PW91/6-311+G (d, p) geometries of **3A**

| No. | Exptl. | 3A-C1    | 3A-C2    | Averaged <sup>a</sup> | Unscaled shifts ( $\delta_{\text{U}}$ ) <sup>b</sup> | Scaled shifts ( $\delta_{\text{S}}$ ) <sup>c</sup> |
|-----|--------|----------|----------|-----------------------|------------------------------------------------------|----------------------------------------------------|
| 4   | 204.2  | -29.6037 | -28.5664 | -29.4969              | 217.5                                                | 207.0                                              |
| 4'  | 199.3  | -19.7955 | -20.7359 | -19.8924              | 207.9                                                | 197.8                                              |
| 12" | 182.3  | -1.8659  | -2.2823  | -1.9088               | 190                                                  | 180.8                                              |
| 12' | 183    | -0.8444  | -0.8146  | -0.8413               | 188.9                                                | 179.7                                              |
| 16" | 172.8  | 6.0155   | 6.35     | 6.05                  | 182                                                  | 173.1                                              |
| 12  | 172.8  | 9.6429   | 7.8256   | 9.4557                | 178.6                                                | 169.9                                              |
| 2'  | 152.3  | 20.7299  | 19.7725  | 20.6313               | 167.4                                                | 159.2                                              |
| 1"  | 151.1  | 30.8206  | 30.314   | 30.7684               | 157.3                                                | 149.6                                              |
| 11  | 142.3  | 38.3448  | 36.7051  | 38.1759               | 149.9                                                | 142.5                                              |
| 3'  | 137.1  | 41.8775  | 41.4416  | 41.8326               | 146.2                                                | 139.0                                              |
| 5"  | 125.1  | 50.204   | 55.2829  | 50.7271               | 137.3                                                | 130.5                                              |
| 13  | 119.5  | 53.0657  | 55.3092  | 53.2968               | 134.7                                                | 128.0                                              |
| 8'  | 80.9   | 104.7651 | 105.4789 | 104.8386              | 83.2                                                 | 78.9                                               |
| 8   | 85.3   | 104.8426 | 104.9205 | 104.8506              | 83.2                                                 | 78.9                                               |
| 8"  | 82.9   | 107.7099 | 106.71   | 107.6069              | 80.4                                                 | 76.2                                               |
| 1   | 76.5   | 109.9418 | 108.5113 | 109.7945              | 78.3                                                 | 74.2                                               |
| 2"  | 76.2   | 113.8062 | 113.9305 | 113.819               | 74.2                                                 | 70.3                                               |
| 4"  | 70.1   | 114.2146 | 113.7985 | 114.1717              | 73.9                                                 | 70.0                                               |
| 2   | 69.5   | 118.1292 | 121.8472 | 118.5122              | 69.5                                                 | 65.8                                               |
| 3   | 70.4   | 120.4723 | 120.9966 | 120.5263              | 67.5                                                 | 63.9                                               |
| 11" | 50.3   | 131.0446 | 130.5895 | 130.9977              | 57                                                   | 53.9                                               |
| 7'  | 53.4   | 131.2497 | 130.9898 | 131.2229              | 56.8                                                 | 53.7                                               |
| 1'  | 47.2   | 131.304  | 130.9622 | 131.2688              | 56.8                                                 | 53.7                                               |
| 7"  | 51.7   | 131.9726 | 131.8217 | 131.9571              | 56.1                                                 | 53.0                                               |
| 11' | 50     | 133.4041 | 132.9509 | 133.3574              | 54.7                                                 | 51.7                                               |
| 7   | 44.7   | 139.6141 | 138.4495 | 139.4941              | 48.6                                                 | 45.8                                               |
| 10  | 39.2   | 141.2416 | 148.0515 | 141.943               | 46.1                                                 | 43.5                                               |
| 3"  | 43.1   | 143.4354 | 145.5185 | 143.65                | 44.4                                                 | 41.8                                               |
| 13' | 36     | 143.8926 | 144.9385 | 144.0003              | 44                                                   | 41.5                                               |
| 13" | 35.8   | 144.1194 | 142.8479 | 143.9884              | 44.1                                                 | 41.6                                               |
| 10" | 30.7   | 144.968  | 148.2151 | 145.3025              | 42.7                                                 | 40.2                                               |

|      |      |          |          |          |      |      |
|------|------|----------|----------|----------|------|------|
| 9'   | 40.2 | 147.9103 | 148.3761 | 147.9583 | 40.1 | 37.7 |
| 10'  | 35.7 | 148.4287 | 148.3531 | 148.4209 | 39.6 | 37.3 |
| 6    | 32.9 | 150.8172 | 151.3464 | 150.8717 | 37.2 | 35.0 |
| 5    | 39.2 | 150.8371 | 151.6122 | 150.9169 | 37.1 | 34.9 |
| 9''  | 38.3 | 151.3871 | 150.5154 | 151.2973 | 36.7 | 34.5 |
| 5'   | 35.2 | 151.5417 | 151.0637 | 151.4925 | 36.6 | 34.4 |
| 6'   | 36.4 | 152.6446 | 152.3071 | 152.6098 | 35.4 | 33.2 |
| 9    | 34.4 | 154.5713 | 151.9658 | 154.3029 | 33.7 | 31.6 |
| 6''  | 25.9 | 158.4871 | 159.8707 | 158.6296 | 29.4 | 27.5 |
| 15'  | 26.1 | 158.8534 | 158.7144 | 158.8391 | 29.2 | 27.3 |
| 15   | 23.8 | 160.6654 | 159.782  | 160.5744 | 27.5 | 25.7 |
| 17'' | 21.4 | 163.9453 | 164.0901 | 163.9602 | 24.1 | 22.5 |
| 15'' | 20.9 | 166.9581 | 167.3877 | 167.0023 | 21   | 19.5 |
| 14'' | 19.9 | 167.4372 | 167.8088 | 167.4755 | 20.6 | 19.1 |
| 14   | 16.4 | 172.5881 | 171.4576 | 172.4717 | 15.6 | 14.4 |
| 14'  | 21.5 | 172.8748 | 172.8051 | 172.8676 | 15.2 | 14.0 |

<sup>a</sup>Averaged according to the Boltzmann-calculated contribution at B3LYP/6-31+G(d,p) level. <sup>b</sup> $\delta_U$  = Calculated Shielding Value (TMS) – Calculated Shielding value (Averaged).  $\delta_S = (\delta_U - 0.5514) / 1.0481$

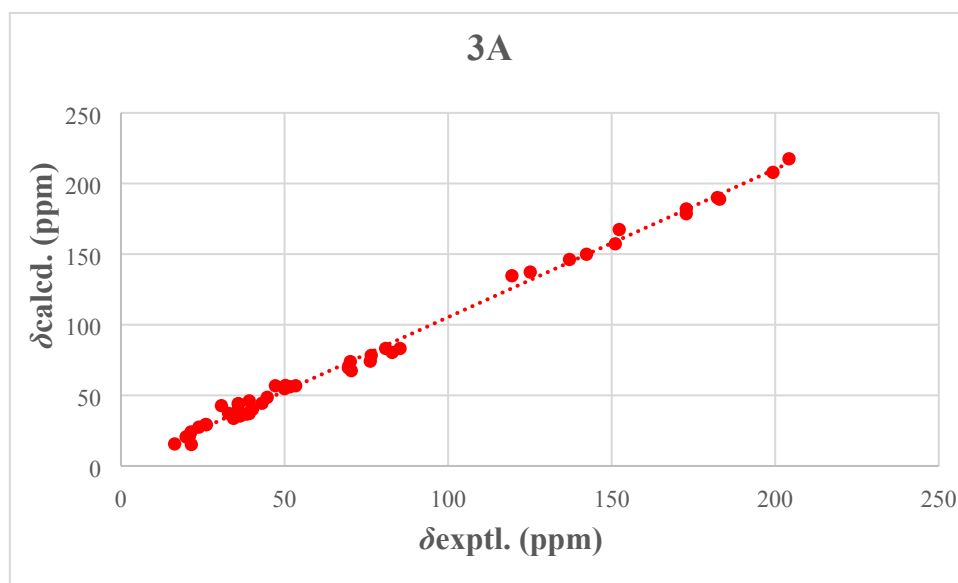

**Figure S52.** Correlation plots of experimental <sup>13</sup>C-NMR chemical shifts versus corresponding calculated <sup>13</sup>C-NMR chemical shifts for **3A**.

**Table S10.** Free energies ( $\Delta G$ ), and Boltzmann distribution abundances of conformers of **3B**.

| Conf.        | B3LYP/6-31+G(d, p) Gibbs free energy (298.15 K) |                       |                        |
|--------------|-------------------------------------------------|-----------------------|------------------------|
|              | G (Hartree)                                     | $\Delta G$ (Kcal/mol) | Boltzmann Distribution |
| <b>3B-C1</b> | -2804.260692                                    | 0.0000                | 0.902                  |
| <b>3B-C2</b> | -2804.258595                                    | 1.3160                | 0.098                  |

**Table S11.** Experimental  $^{13}\text{C}$ -NMR chemical shifts and GIAO isotropic magnetic shielding values calculated for PCM/mPW1PW91/6-311+G (d, p) geometries of **3B**

| No. | Exptl. | 3B-C1    | 3B-C2    | Averaged <sup>a</sup> | Unscaled shifts ( $\delta_{\text{U}}$ ) <sup>b</sup> | Scaled shifts ( $\delta_{\text{S}}$ ) <sup>c</sup> |
|-----|--------|----------|----------|-----------------------|------------------------------------------------------|----------------------------------------------------|
| 4   | 204.2  | -28.0474 | -28.0752 | -28.0501              | 216.1                                                | 205.8                                              |
| 4'  | 199.3  | -20.6664 | -20.4835 | -20.6485              | 208.7                                                | 198.7                                              |
| 12" | 182.3  | -1.9648  | -2.1188  | -1.9799               | 190                                                  | 180.9                                              |
| 12' | 183    | -1.1951  | -1.2103  | -1.1966               | 189.2                                                | 180.1                                              |
| 16" | 172.8  | 6.042    | 5.9882   | 6.0367                | 182                                                  | 173.3                                              |
| 12  | 172.8  | 8.903    | 8.9388   | 8.9065                | 179.1                                                | 170.5                                              |
| 2'  | 152.3  | 19.9845  | 20.1223  | 19.998                | 168                                                  | 159.9                                              |
| 1"  | 151.1  | 30.4217  | 34.251   | 30.797                | 157.2                                                | 149.6                                              |
| 11  | 142.3  | 37.349   | 37.2971  | 37.3439               | 150.7                                                | 143.4                                              |
| 3'  | 137.1  | 42.5643  | 42.3315  | 42.5415               | 145.5                                                | 138.4                                              |
| 5"  | 125.1  | 53.8948  | 53.9583  | 53.901                | 132.8                                                | 126.3                                              |
| 13  | 119.5  | 55.4543  | 53.4395  | 55.2568               | 134.1                                                | 127.6                                              |
| 8'  | 80.9   | 105.8006 | 105.6093 | 105.7819              | 82.3                                                 | 78.1                                               |
| 8   | 85.3   | 106.9248 | 106.9304 | 106.9253              | 80.2                                                 | 76.1                                               |
| 8"  | 82.9   | 107.236  | 107.1674 | 107.2293              | 80.8                                                 | 76.7                                               |
| 1   | 76.5   | 107.8086 | 107.7575 | 107.8036              | 81.1                                                 | 77                                                 |
| 2"  | 76.2   | 113.5137 | 114.2215 | 113.5831              | 74.5                                                 | 70.7                                               |
| 4"  | 70.1   | 113.973  | 114.2179 | 113.997               | 74                                                   | 70.2                                               |
| 2   | 69.5   | 114.4404 | 114.37   | 114.4335              | 70.4                                                 | 66.8                                               |
| 3   | 70.4   | 117.6323 | 117.6178 | 117.6309              | 73.6                                                 | 69.8                                               |
| 11" | 50.3   | 130.0791 | 130.2168 | 130.0926              | 58                                                   | 54.9                                               |
| 7'  | 53.4   | 130.5794 | 130.5776 | 130.5792              | 55.5                                                 | 52.5                                               |
| 1'  | 47.2   | 132.0504 | 132.1229 | 132.0575              | 57.5                                                 | 54.5                                               |
| 7"  | 51.7   | 132.5494 | 132.5377 | 132.5483              | 56                                                   | 53                                                 |
| 11' | 50     | 133.479  | 133.5293 | 133.4839              | 54.6                                                 | 51.7                                               |
| 7   | 44.7   | 142.3039 | 142.3827 | 142.3116              | 43.4                                                 | 41                                                 |
| 10  | 39.2   | 143.7862 | 143.6385 | 143.7717              | 37                                                   | 34.9                                               |
| 3"  | 43.1   | 144.6768 | 144.6601 | 144.6752              | 43                                                   | 40.6                                               |
| 13' | 36     | 145.167  | 143.8253 | 145.0355              | 44.3                                                 | 41.9                                               |
| 13" | 35.8   | 146.5159 | 146.2114 | 146.4861              | 45.7                                                 | 43.2                                               |
| 10" | 30.7   | 147.1285 | 147.2662 | 147.142               | 41.6                                                 | 39.3                                               |
| 9'  | 40.2   | 147.9166 | 147.9732 | 147.9221              | 38.8                                                 | 36.6                                               |
| 10' | 35.7   | 149.2838 | 149.1143 | 149.2672              | 40.1                                                 | 37.8                                               |
| 6   | 32.9   | 150.2121 | 150.223  | 150.2132              | 37.8                                                 | 35.7                                               |
| 5   | 39.2   | 150.9328 | 151.0972 | 150.9489              | 40.9                                                 | 38.6                                               |
| 9"  | 38.3   | 151.0294 | 151.0325 | 151.0297              | 36                                                   | 33.9                                               |
| 5'  | 35.2   | 151.123  | 151.1108 | 151.1218              | 37.1                                                 | 35                                                 |
| 6'  | 36.4   | 152.0613 | 151.8884 | 152.0444              | 35.8                                                 | 33.7                                               |
| 9   | 34.4   | 152.2917 | 152.225  | 152.2852              | 36.9                                                 | 34.8                                               |
| 6"  | 25.9   | 158.4673 | 158.4997 | 158.4705              | 28.1                                                 | 26.4                                               |

|     |      |          |          |          |      |      |
|-----|------|----------|----------|----------|------|------|
| 15' | 26.1 | 159.9501 | 160.2244 | 159.977  | 29.6 | 27.8 |
| 15  | 23.8 | 160.31   | 160.3853 | 160.3174 | 27.7 | 26   |
| 17" | 21.4 | 164.0776 | 164.0701 | 164.0769 | 24   | 22.5 |
| 15" | 20.9 | 167.6969 | 167.455  | 167.6732 | 20.4 | 19   |
| 14" | 19.9 | 168.4364 | 168.3289 | 168.4259 | 19.6 | 18.3 |
| 14  | 16.4 | 170.2777 | 170.3516 | 170.2849 | 17.8 | 16.6 |
| 14' | 21.5 | 173.3459 | 173.2753 | 173.339  | 14.7 | 13.6 |

<sup>a</sup>Averaged according to the Boltzmann-calculated contribution at B3LYP/6-31+G(d,p) level. <sup>b</sup> $\delta_U$  = Calculated Shielding Value (TMS) – Calculated Shielding value (Averaged).  $\delta_S = (\delta_U - 0.4378) / 1.0479$

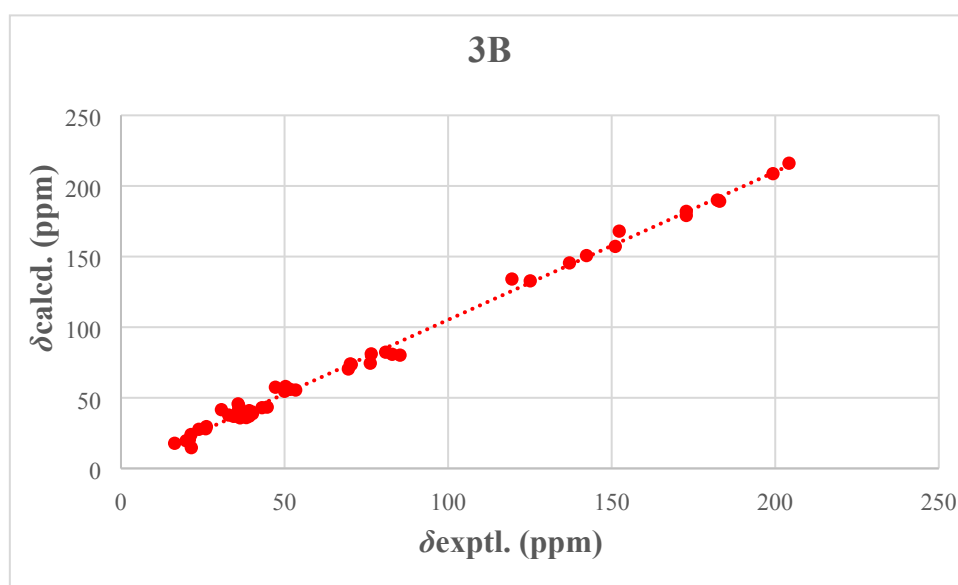

**Figure S53.** Correlation plots of experimental <sup>13</sup>C-NMR chemical shifts versus corresponding calculated <sup>13</sup>C-NMR chemical shifts for **3B**.

**Table S12.** Experimental chemical shifts, the calculated shielding tensors for **3A** (isomer 1) and **3B** (isomer 2), and the DP4+ probability of **3A** and **3B**

|    | A          | B    | C           | D           | E            | F        | G                 | H        |
|----|------------|------|-------------|-------------|--------------|----------|-------------------|----------|
| 1  | Functional |      | Solvent?    |             | Basis Set    |          | Type of Data      |          |
| 2  | mPWIPW91   |      | PCM         |             | 6-311+G(d,p) |          | Shielding Tensors |          |
| 3  |            |      |             |             |              |          |                   |          |
| 12 |            |      | DP4+        | 0.01%       | 99.99%       | -        | -                 | -        |
| 14 | Nuclei     | sp2? | Experimenta | Isomer 1    | Isomer 2     | Isomer 3 | Isomer 4          | Isomer 5 |
| 15 | C          | x    | 204.2       | -29.5       | -28.1        |          |                   |          |
| 16 | C          | x    | 199.3       | -19.9       | -20.6        |          |                   |          |
| 17 | C          | x    | 182.3       | -1.9        | -2.0         |          |                   |          |
| 18 | C          | x    | 183         | -0.8        | -1.2         |          |                   |          |
| 19 | C          | x    | 172.8       | 6.0         | 6.0          |          |                   |          |
| 20 | C          | x    | 172.8       | 9.5         | 8.9          |          |                   |          |
| 21 | C          | x    | 152.3       | 20.6        | 20.0         |          |                   |          |
| 22 | C          | x    | 151.1       | 30.8        | 30.8         |          |                   |          |
| 23 | C          | x    | 142.3       | 38.2        | 37.3         |          |                   |          |
| 24 | C          | x    | 137.1       | 41.8        | 42.5         |          |                   |          |
| 25 | C          | x    | 125.1       | 50.7        | 55.3         |          |                   |          |
| 26 | C          | x    | 119.5       | 53.30       | 53.90        |          |                   |          |
| 27 | C          |      | 80.9        | 104.84      | 105.78       |          |                   |          |
| 28 | C          |      | 85.3        | 104.85      | 107.80       |          |                   |          |
| 29 | C          |      | 82.9        | 107.61      | 107.23       |          |                   |          |
| 30 | C          |      | 76.5        | 109.79      | 106.93       |          |                   |          |
| 31 | C          |      | 76.2        | 113.82      | 113.58       |          |                   |          |
| 32 | C          |      | 70.1        | 114.17      | 114.00       |          |                   |          |
| 33 | C          |      | 69.5        | 118.51      | 117.63       |          |                   |          |
| 34 | C          |      | 70.4        | 120.53      | 114.43       |          |                   |          |
| 35 | C          |      | 50.3        | 131.00      | 130.09       |          |                   |          |
| 36 | C          |      | 53.4        | 131.22      | 132.55       |          |                   |          |
| 37 | C          |      | 47.2        | 131.27      | 130.58       |          |                   |          |
| 38 | C          |      | 51.7        | 131.96      | 132.06       |          |                   |          |
| 39 | C          |      | 50          | 133.36      | 133.48       |          |                   |          |
| 40 | C          |      | 44.7        | 139.4941462 | 144.6751634  |          |                   |          |
| 41 | C          |      | 39.2        | 141.9430197 | 151.0297038  |          |                   |          |
| 42 | C          |      | 43.1        | 143.6499593 | 145.0355134  |          |                   |          |
| 43 | C          |      | 36          | 144.0003277 | 143.7717254  |          |                   |          |
| 44 | C          |      | 35.8        | 143.9884355 | 142.3116224  |          |                   |          |
| 45 | C          |      | 30.7        | 145.3024513 | 146.486059   |          |                   |          |
| 46 | C          |      | 40.2        | 147.9582774 | 149.267189   |          |                   |          |
| 47 | C          |      | 35.7        | 148.4209132 | 147.9221468  |          |                   |          |
| 48 | C          |      | 32.9        | 150.8717076 | 150.2131682  |          |                   |          |
| 49 | C          |      | 39.2        | 150.9169353 | 147.1419946  |          |                   |          |
| 50 | C          |      | 38.3        | 151.2973149 | 152.0443558  |          |                   |          |
| 51 | C          |      | 35.2        | 151.492466  | 150.9489112  |          |                   |          |
| 52 | C          |      | 36.4        | 152.6098375 | 152.2851634  |          |                   |          |
| 53 | C          |      | 34.4        | 154.3029335 | 151.1218044  |          |                   |          |
| 54 | C          |      | 25.9        | 158.6296108 | 159.9769814  |          |                   |          |
| 55 | C          |      | 26.1        | 158.839083  | 158.4704752  |          |                   |          |
| 56 | C          |      | 23.8        | 160.5744098 | 160.3173794  |          |                   |          |
| 57 | C          |      | 21.4        | 163.9602144 | 164.076865   |          |                   |          |
| 58 | C          |      | 20.9        | 167.0023488 | 167.6731938  |          |                   |          |
| 59 | C          |      | 19.9        | 167.4754748 | 168.425865   |          |                   |          |
| 60 | C          |      | 16.4        | 172.4716585 | 170.2849422  |          |                   |          |
| 61 | C          |      | 21.5        | 172.8676209 | 173.3389812  |          |                   |          |
